# Supplementary material for: Contrasting effects of Ksr2, an obesity gene, on trabecular bone volume and bone marrow adiposity
Source: eLife. 2022 Nov 7;11:e82810. doi: 10.7554/eLife.82810 (PMC9640193; doi:10.7554/eLife.82810)
Supplement: Figure 1—source data 1. — Source data for Figure 1C–H. [file elife-82810-fig1-data1.xlsx]

## Sheet: Female-Ss.Trab
Source Data for Figure 1C-1H
DATA FROM -- M:\Mohan\Mouse Data Only\0029- KSR2\KSR2 Lexicon Data - CG
Individual Samples
BV/TV
	11wks			15wks
	wt		ko		wt		ko
0.9	4.9	1.9	14.89	2.9	7.55	3.9	36.76
0.9	16.58	1.9	26.17	2.9	10.83	3.9	15.68
0.9	9.08	1.9	14.38	2.9	5.23	3.9	31.82
0.9	17.58	1.9	19.17	2.9	7.86	3.9	41.84
0.9	15.01	1.9	18.5	2.9	9.26	3.9	12.12
0.9	18.79	1.9	25.24	2.9	12.62	3.9	24.43
0.9	13.38	1.9	19.02			3.9	16.3
0.9	20.71	1.9	21.01
0.9	9.78	1.9	19.53
0.9	11.98
Averages
BV/TV
11wk wt	11wk ko	15wk wt	15wk ko
13.779	19.7678	8.89167	25.5643
1.63776	1.3327	0.986559	4.35053
	0.010117		0.00540863	pvalues
CONN.D
	11wks			15wks
	wt		ko		wt		ko
0.9	43.8816	1.9	119.235	2.9	91.7677	3.9	174.654
0.9	209.783	1.9	229.427	2.9	138.798	3.9	117.114
0.9	86.708	1.9	157.235	2.9	75.264	3.9	207.187
0.9	197.166	1.9	182.317	2.9	78.6525	3.9	255.122
0.9	205.308	1.9	151.023	2.9	114.662	3.9	132.886
0.9	239.966	1.9	260.106	2.9	135.914	3.9	201.662
0.9	178.169	1.9	174.531			3.9	142.827
0.9	216.335	1.9	213.255
0.9	144.513	1.9	176.76
0.9	154.238
Averages
CD
11wk wt	11wk ko	15wk wt	15wk ko
167.607	184.876	105.843	175.922
20.5962	14.3604	10.6107	18.4649
	0.494242		0.0102573	pvalues
SMI
	11wks			15wks
	wt		ko		wt		ko
0.9	3.2544	1.9	2.4738	2.9	2.6551	3.9	0.602
0.9	2.3141	1.9	1.8205	2.9	2.6011	3.9	2.1889
0.9	3.0775	1.9	2.3975	2.9	3.0775	3.9	0.9736
0.9	2.3823	1.9	1.9854	2.9	2.8809	3.9	0.638
0.9	2.4483	1.9	1.9238	2.9	2.8943	3.9	2.6094
0.9	2.1636	1.9	1.74	2.9	2.2398	3.9	1.5738
0.9	2.4866	1.9	1.9016			3.9	1.991
0.9	1.8864	1.9	1.8816
0.9	2.8013	1.9	1.9509
0.9	2.4439
Averages
TRI
11wk wt	11wk ko	15wk wt	15wk ko
2.52584	2.00834	2.72478	1.51096
0.137473	0.084477	0.111211	0.299904
	0.00473586		0.00474414	pvalues
Tb.N
	11wks			15wks
	wt		ko		wt		ko
0.9	3.3832	1.9	4.151	2.9	3.738	3.9	6.1248
0.9	5.0605	1.9	6.3212	2.9	4.3164	3.9	4.3481
0.9	3.8942	1.9	4.5512	2.9	3.265	3.9	6.3717
0.9	5.4414	1.9	5.0624	2.9	3.4676	3.9	8.1041
0.9	4.9552	1.9	4.5902	2.9	4.057	3.9	4.5301
0.9	5.3782	1.9	6.3569	2.9	4.2014	3.9	5.9857
0.9	5.2205	1.9	5.0106			3.9	4.3337
0.9	5.4178	1.9	5.9328
0.9	4.1496	1.9	5.1813
0.9	4.3837
Averages
Tb.N
11wk wt	11wk ko	15wk wt	15wk ko
4.72843	5.23973	3.8409	5.68546
0.242646	0.265274	0.158957	0.524508
	0.16171		0.00978808	pvalues
Tb.Th
	11wks			15wks
	wt		ko		wt		ko
0.9	40	1.9	59.2	2.9	39.8	3.9	79.2
0.9	51.1	1.9	63.1	2.9	45.2	3.9	56.2
0.9	46.8	1.9	49.6	2.9	39.2	3.9	63.2
0.9	53.5	1.9	54.4	2.9	45.2	3.9	78.6
0.9	48.5	1.9	55.8	2.9	48.8	3.9	46.8
0.9	53.1	1.9	57.3	2.9	47.3	3.9	56.6
0.9	44.7	1.9	53.6			3.9	53.4
0.9	54.8	1.9	53.4
0.9	43.2	1.9	55.1
0.9	45
Averages
Tb.Th
11wk wt	11wk ko	15wk wt	15wk ko
48.07	55.7222	44.25	62
1.65059	1.28309	1.48435	4.73246
	0.00167165		0.00686954	pvalues
Tb.S
	11wks			15wks
	wt		ko		wt		ko
0.9	297.1	1.9	244.6	2.9	265.9	3.9	158.3
0.9	194.7	1.9	151.2	2.9	228.8	3.9	234.6
0.9	262.7	1.9	216.6	2.9	310.2	3.9	147.9
0.9	188.4	1.9	191.6	2.9	287.7	3.9	123.8
0.9	201.8	1.9	212.7	2.9	247.8	3.9	221.6
0.9	187.5	1.9	151.8	2.9	233.2	3.9	163
0.9	191	1.9	192.7			3.9	229.3
0.9	180.1	1.9	166.3
0.9	241.2	1.9	187.9
0.9	227.4
Averages
Tb.S
11wk wt	11wk ko	15wk wt	15wk ko
217.19	190.6	262.267	182.643
12.9825	10.3692	12.1088	16.9327
	0.121202		0.00401185	pvalues
