# Supplementary material for: Contrasting effects of Ksr2, an obesity gene, on trabecular bone volume and bone marrow adiposity
Source: eLife. 2022 Nov 7;11:e82810. doi: 10.7554/eLife.82810 (PMC9640193; doi:10.7554/eLife.82810)
Supplement: Figure 1—source data 2. — Source data for Figure 1J–M. [file elife-82810-fig1-data2.xlsx]

## Sheet: Female-Primary Spongiosa
Source Data for Figure 1J-1M
DATA FROM -- M:\Mohan\Mouse Data Only\0029- KSR2\KSR2 Lexicon Data - CG
Individual Samples
BV/TV
	15wks
	wt		ko
0.9	29.06	1.9	2906
0.9	43.39	1.9	4339
0.9	22.87	1.9	2287
0.9	30.1	1.9	3010
0.9	33.46	1.9	3346
0.9	45.95	1.9	4595
Averages
BV/TV
15wk wt	15wk ko
34.1383	48.1533
3.62694	3.89709
	0.0302662	pvalue
Tb.N
	15wks
	wt		ko
0.9	7.3929	1.9	11.9914
0.9	9.7009	1.9	7.4258
0.9	6.8345	1.9	9.9359
0.9	6.8516	1.9	12.7448
0.9	8.195	1.9	10.6389
0.9	10.4265	1.9	9.5678
		1.9	9.6123
Averages
Tb.N
15wk wt	15wk ko
8.23357	10.2738
0.620147	0.660998
	0.0479615	pvalue
Tb.Th
	15wks
	wt		ko
0.9	55.7	1.9	89.9
0.9	58.5	1.9	59.7
0.9	45.6	1.9	66.2
0.9	57.5	1.9	83.6
0.9	56.9	1.9	65.9
0.9	62.3	1.9	66.8
		1.9	66.8
Averages
Tb.Th
15wk wt	15wk ko
56.0833	71.2714
2.28917	4.16183
	0.0111645	pvalue
Tb.S
	15wks
	wt		ko
0.9	145.5	1.9	75
0.9	107.4	1.9	97
0.9	155.6	1.9	71.4
0.9	165.4	1.9	101.7
0.9	134.3	1.9	112.3
0.9	98.4	1.9	115.5
Averages
Tb.S
15wk wt	15wk ko
134.433	95.4833
10.8914	7.01832
	0.0149067	pvalue
