# Supplementary material for: Contrasting effects of Ksr2, an obesity gene, on trabecular bone volume and bone marrow adiposity
Source: eLife. 2022 Nov 7;11:e82810. doi: 10.7554/eLife.82810 (PMC9640193; doi:10.7554/eLife.82810)
Supplement: Figure 1—source data 3. — Source data for Figure 1O–Q. [file elife-82810-fig1-data3.xlsx]

## Sheet: Female-Cortical
Source Data for Figure 1O-1Q
DATA FROM -- M:\Mohan\Mouse Data Only\0029- KSR2\KSR2 Lexicon Data - CG
Individual Samples
TV
	15wks
	wt		ko
0.9	1.5565	1.9	1.8773
0.9	1.8643	1.9	1.5874
0.9	1.8835	1.9	1.664
0.9	1.6676	1.9	1.6807
0.9	1.631	1.9	1.5357
0.9	1.6344	1.9	1.9081
		1.9	1.6683
Averages
TV
15wk wt	15wk ko
1.70622	1.70307
0.0510297	0.0527847
	0.967956	pvalue
vBMD
	15wks
	wt		ko
0.9	666.515	1.9	679.207
0.9	653.205	1.9	688.286
0.9	647.124	1.9	662.989
0.9	576.61	1.9	761.796
0.9	657.612	1.9	691.283
0.9	697.1	1.9	685.201
		1.9	716.05
Averages
vBMD (mean1)
15wk wt	15wk ko
649.694	697.83
15.0742	12.2258
	0.0348925	pvalue
BV/TV
	15wks
	wt		ko
0.9	51.84	1.9	54.79
0.9	51.24	1.9	56.29
0.9	51.09	1.9	53.02
0.9	46.39	1.9	58.87
0.9	50.58	1.9	53.37
0.9	55.38	1.9	53.4
		1.9	56.89
Averages
BV/TV
15wk wt	15wk ko
51.0867	55.2329
2.87538	2.19905
	0.0348925	pvalue
