# Supplementary material for: Contrasting effects of Ksr2, an obesity gene, on trabecular bone volume and bone marrow adiposity
Source: eLife. 2022 Nov 7;11:e82810. doi: 10.7554/eLife.82810 (PMC9640193; doi:10.7554/eLife.82810)
Supplement: Figure 2—source data 1. — Source data for Figure 2B–G. [file elife-82810-fig2-data1.xlsx]

## Sheet: Male-Trab
Source Data for Figure 2B-2G
Individual Samples
BV/TV
	16wks
	wt		ko
0.9	13.28	1.9	13.38
0.9	7.64	1.9	22.15
0.9	9.52	1.9	11.09
0.9	4.12	1.9	23.69
0.9	5.88	1.9	18.23
0.9	15.56
0.9	8.08
0.9	9.31
0.9	6.38
Averages
BV/TV
16wk wt	16wk ko
8.86333	17.708
1.20566	2.43226
	0.00315683	pvalue
CONN.D
	16wks
	wt		ko
0.9	138.822	1.9	109.325
0.9	68.6702	1.9	196.173
0.9	100.139	1.9	92.27
0.9	20.9499	1.9	219.451
0.9	62.9031	1.9	171.855
0.9	166.876
0.9	47.1116
0.9	73.5963
0.9	95.6853
Averages
CD
16wk wt	16wk ko
86.0836	157.815
15.0721	24.6119
	0.0215654	pvalue
SMI
	16wks
	wt		ko
0.9	2.3407	1.9	2.452
0.9	2.9691	1.9	1.7643
0.9	2.7383	1.9	2.5833
0.9	3.5079	1.9	1.4241
0.9	3.1056	1.9	1.9656
0.9	2.0699
0.9	2.8713
0.9	2.8579
0.9	2.9317
Averages
TRI
16wk wt	16wk ko
2.82138	2.03786
0.139074	0.215148
	0.00769104	pvalue
Tb.N
	16wks
	wt		ko
0.9	4.4614	1.9	4.3561
0.9	3.9134	1.9	5.1796
0.9	4.1423	1.9	3.8369
0.9	3.0914	1.9	5.3991
0.9	3.4793	1.9	5.0658
0.9	4.9656
0.9	3.5424
0.9	3.9793
0.9	4.1278
Averages
Tb.N
16wk wt	16wk ko
3.96699	4.7675
0.185819	0.290946
	0.0316175	pvalue
Tb.th
	16wks
	wt		ko
0.9	47.6	1.9	51.3
0.9	42.7	1.9	59.8
0.9	46.3	1.9	50.9
0.9	39.8	1.9	53.8
0.9	42.2	1.9	52.1
0.9	46.9
0.9	47.9
0.9	47.1
0.9	37.1
Averages
Tb.Th
16wk wt	16wk ko
44.1778	53.58
1.29837	1.63261
	0.000838346	pvalue
Tb.S
	16wks
	wt		ko
0.9	216.3	1.9	225.4
0.9	249.4	1.9	184.4
0.9	237.5	1.9	258.7
0.9	326.1	1.9	171.8
0.9	283	1.9	189.7
0.9	196.1
0.9	281.9
0.9	247.1
0.9	238
Averages
Tb.S
16wk wt	16wk ko
252.822	206
13.0043	15.899
	0.0468369	pvalue
