# Supplementary material for: Contrasting effects of Ksr2, an obesity gene, on trabecular bone volume and bone marrow adiposity
Source: eLife. 2022 Nov 7;11:e82810. doi: 10.7554/eLife.82810 (PMC9640193; doi:10.7554/eLife.82810)
Supplement: Figure 2—source data 2. — Source data for Figure 2I–K. [file elife-82810-fig2-data2.xlsx]

## Sheet: Male-Cortical
Source Data for Figure 2I-2K
Individual Samples
TV
	16wks
	wt		ko
0.9	1.9308	1.9	1.9513
0.9	2.4549	1.9	2.7802
0.9	2.0131	1.9	2.1651
0.9	2.8414	1.9	3.084
0.9	2.4754	1.9	1.6167
0.9	2.5586
Averages
TV
16wk wt	16wk ko
2.37903	2.31946
0.140936	0.269262
	0.33163	pvalue
BV/TV
	16wks
	wt		ko
0.9	43.98	1.9	45.14
0.9	46.89	1.9	53.76
0.9	42.62	1.9	46.83
0.9	46.43	1.9	47.54
0.9	42.22	1.9	49.1
0.9	47.67
0.9	46.64
Averages
BV/TV
16wk wt	16wk ko
45.2071	48.474
0.839052	1.4667
	0.06	pvalue
vBMD
	16wks
	wt		ko
0.9	546.378	1.9	587.452
0.9	608.165	1.9	681.235
0.9	536.33	1.9	603.053
0.9	603.934	1.9	590.184
0.9	540.384	1.9	610.986
0.9	611.867
Averages
vBMD (mean1)
16wk wt	16wk ko
574.51	614.582
15.064	17.2042
	0.460767	pvalue
