# Supplementary material for: Contrasting effects of Ksr2, an obesity gene, on trabecular bone volume and bone marrow adiposity
Source: eLife. 2022 Nov 7;11:e82810. doi: 10.7554/eLife.82810 (PMC9640193; doi:10.7554/eLife.82810)
Supplement: Figure 2—source data 3. — Source data for Figure 2L–Q. [file elife-82810-fig2-data3.xlsx]

## Sheet: KSR1 femur trab
Source Data for Figure 2L-2Q
DATA FROM -- M:\Mohan\Mouse Data Only\0029- KSR1\uCT Analysis
Individual Samples
BV/TV
	Females			Males
	wt		ko		wt		ko
0.9	8.31	1.9	8.37	2.9	15.56	3.9	14
0.9	10.2	1.9	10.42	2.9	17.91	3.9	17.84
0.9	8.85	1.9	10.8	2.9	13.92	3.9	15.3
0.9	12.35	1.9	12.66	2.9	19.77	3.9	15.37
0.9	7.13	1.9	9.56	2.9	15.2	3.9	16.08
0.9	6.81	1.9	8.55			3.9	15.14
0.9	7.2	1.9	6.45
0.9	6.32	1.9	8.22
0.9	9.21	1.9	4.44
0.9	7.82
Averages
BV/TV
Fe WT	Fe KO	M WT	M KO
8.42	8.83	16.472	15.6217
0.576859	0.809744	1.04659	0.521526
	0.680568		0.461991	pvalue
CONN.D
	Females			Males
	wt		ko		wt		ko
0.9	106.64	1.9	102.32	2.9	205.34	3.9	191.93
0.9	130.437	1.9	148.93	2.9	203.42	3.9	209.96
0.9	124.846	1.9	135.1	2.9	176.87	3.9	183.8
0.9	142.76	1.9	162.61	2.9	190.73	3.9	173.83
0.9	82.5637	1.9	118.09		159.29		153.79
0.9	72.1242		118.27				146.094
0.9	91.077		49.76
	87.7293		77.43
	98.1968		50.5942
	74.108
Averages
CD
Fe WT	Fe KO	M WT	M KO
101.048	107.012	187.13	176.567
7.73895	13.5629	8.63213	9.76105
	0.699924		0.447862	pvalue
SMI
	Females			Males
	wt		ko		wt		ko
0.9	2.85	1.9	2.54	2.9	2.08	3.9	2.25
0.9	2.51	1.9	2.52	2.9	1.89	3.9	1.8
0.9	2.64	1.9	2.48	2.9	2.21	3.9	2.15
0.9	2.43	1.9	2.35	2.9	1.72	3.9	2.11
0.9	3.03	1.9	2.58	2.9	2.15		2.06
0.9	2.68	1.9	2.64				2.2331
0.9	2.85		3.06
	2.91		2.8
	2.79		3.0057
	2.78
Averages
TRI
Fe WT	Fe KO	M WT	M KO
2.747	2.66397	2.01	2.10052
0.0580622	0.0806456	0.0902774	0.0669363
	0.408106		0.432148	pvalue
Tb.N
	Females			Males
	wt		ko		wt		ko
0.9	3.93	1.9	3.79	2.9	4.87	3.9	4.9
0.9	4.13	1.9	4.13	2.9	5.06	3.9	5.01
0.9	3.91	1.9	4.1	2.9	4.66	3.9	4.93
0.9	4.31	1.9	4.49	2.9	5.24	3.9	4.68
0.9	3.47	1.9	4	2.9	4.84		4.68
0.9	3.21	1.9	3.97				4.204
0.9	3.73		3.28
	3.59		3.44
	3.95		2.9632
	3.55
Averages
Tb.N
Fe WT	Fe KO	M WT	M KO
3.778	3.79591	4.934	4.734
0.104571	0.160038	0.0993781	0.119566
	0.924978		0.242143	pvalue
Tb.Th
	Females			Males
	wt		ko		wt		ko
0.9	41.5	1.9	40.6	2.9	45.9	3.9	44.2
0.9	43.6	1.9	42.9	2.9	48.1	3.9	47.4
0.9	40.7	1.9	45.5	2.9	46	3.9	46.5
0.9	47.2	1.9	45	2.9	52.4	3.9	47.5
0.9	43.1	1.9	43.8	2.9	48.1		51
0.9	42	1.9	40.8				53.3
	40.6		47.5
	38.5		46.5
	44.6		36.9
	45
Averages
Tb.Th
Fe WT	Fe KO	M WT	M KO
42.68	43.2778	48.1	48.3167
0.803437	1.12123	1.17771	1.33901
	0.665459		0.907979	pvalue
Tb.S
	Females			Males
	wt		ko		wt		ko
0.9	250.3	1.9	259.4	2.9	198	3.9	197.1
	236.6	1.9	238.9	2.9	188.2	3.9	190.1
0.9	251.7	1.9	239.9	2.9	208.6	3.9	198.1
	227.2	1.9	218.3	2.9	181.8	3.9	207.5
0.9	285.6	1.9	250	2.9	199		206.2
	311	1.9	250.6				230.2
0.9	268.1		306.5				259.4
0.9	274.7		287.7
	250.6		337.5
	282.7
Averages
Tb.S
Fe WT	Fe KO	M WT	M KO
263.85	265.422	195.12	204.867
8.01378	12.6095	4.63879	9.15956
	0.915659		0.162936	pvalue
