# Supplementary material for: Contrasting effects of Ksr2, an obesity gene, on trabecular bone volume and bone marrow adiposity
Source: eLife. 2022 Nov 7;11:e82810. doi: 10.7554/eLife.82810 (PMC9640193; doi:10.7554/eLife.82810)
Supplement: Figure 3—figure supplement 1—source data 1. — Average fold changes plotted and t-test values are highlighted in yellow. Source data for Figure 3—figure supplement 1. [file elife-82810-fig3-figsupp1-data1.xlsx]

## Sheet: Ksr2 Verterbra microCT
Source data for Figure 3-Figure supplement 1B-1F
Individual Samples
BV/TV
	8wks
	wt		ko
0.9	27.75	1.9	24.77
0.9	24.96	1.9	28.65
0.9	37.85	1.9	32.25
0.9	29.69	1.9	21.79
0.9	32.01	1.9	25.07
0.9	24.04	1.9	26.7
0.9	27.5	1.9	22.66
0.9	26.14	1.9	24.5
		1.9	31.99
		1.9	31.53
Averages
BV/TV
wt	ko
28.7425	26.991
1.58251	1.23253
	0.325278	pvalues
Tb.N
	8wks
	wt		ko
0.9	5.62	1.9	5.51
0.9	5.82	1.9	5.82
0.9	6.36	1.9	5.77
0.9	5.59	1.9	4.74
0.9	5.83	1.9	5.5798
0.9	4.93	1.9	5.2902
0.9	5.1974	1.9	5.0693
0.9	5.2432	1.9	5.3502
		1.9	5.3907
		1.9	6.3066
Averages
Tb.N
wt	ko
5.57383	5.48268
0.44916	0.430875
	0.539199	pvalues
Tb.Th
	8wks
	wt		ko
0.9	50.9	1.9	47.8
0.9	45.5	1.9	49.6
0.9	56.6	1.9	58.2
0.9	49.4	1.9	45.5
0.9	52.1	1.9	48.1
0.9	49.1	1.9	50.3
0.9	52.3	1.9	45.8
0.9	50.9	1.9	47.6
		1.9	59.2
		1.9	52
Averages
Tb.Th
wt	ko
50.85	50.41
1.12218	1.51492
	0.840809	pvalues
Tb.S
	8wks
	wt		ko
0.9	175.6	1.9	176.2
0.9	166.6	1.9	169.4
0.9	166.6	1.9	172.7
0.9	182.4	1.9	210
0.9	178.5	1.9	175.3
0.9	202.6	1.9	192.4
0.9	196.2	1.9	195.8
0.9	197.2	1.9	187.4
		1.9	198.9
		1.9	158.5
Averages
Tb.S
wt	ko
183.213	183.66
4.95149	4.99538
	0.74606	pvalues
vBMD
	8wks
	wt		ko
0.9	231.574	1.9	210.49
0.9	205.222	1.9	239.91
0.9	295.152	1.9	265.13
0.9	231.04	1.9	186.21
0.9	249.453	1.9	209.558
0.9	207.89	1.9	212.627
0.9	226.504	1.9	192.88
0.9	210.225	1.9	199.818
0.9		1.9	243.983
0.9		1.9	246.785
Averages
vBMD
wt	ko
232.132	220.739
29.5114	26.3706
	0.31017	pvalues
