# Supplementary material for: Contrasting effects of Ksr2, an obesity gene, on trabecular bone volume and bone marrow adiposity
Source: eLife. 2022 Nov 7;11:e82810. doi: 10.7554/eLife.82810 (PMC9640193; doi:10.7554/eLife.82810)
Supplement: Figure 3—source data 1. — Source data for Figure 3B–G. [file elife-82810-fig3-data1.xlsx]

## Sheet: DBA pixi
Source Data for Figure 3B-3G
8wk Ksr2 Pixi Analysis
Individual Samples
BL
	8wks
	wt		Mutant
0.9	8	1.9	8.5
0.9	8	1.9	8.7
0.9	8.9	1.9	8.6
0.9	8.5	1.9	8.6
0.9	9.1	1.9	8.5
0.9	9	1.9	8
0.9	8.6	1.9	8
0.9	8.1	1.9	8.9
0.9	8.9	1.9	7.8
0.9	8.5	1.9	7.5
		1.9	8.1
Averages		1.9	8.8
BL
8wk WT	8wk Mut
8.56	8.33333
0.157561	0.16619
	0.232115	pvalue
BW
	8wks
	wt		Mutant
0.9	16.14	1.9	23.19
0.9	15.57	1.9	16.82
0.9	16.71	1.9	19.68
0.9	17.01	1.9	20.62
0.9	17.44	1.9	17.06
0.9	15.89	1.9	18.15
0.9	16.7	1.9	22.49
		1.9	17.45
		1.9	18.68
Averages
BW
8wk WT	8wk Mut
16.4943	19.3489
0.248528	0.88106
	0.0074866	pvalue
%Fat
	8wks
	wt		Mutant
0.9	52.019	1.9	53.5656
0.9	46.8336	1.9	67.6415
0.9	41.5763	1.9	53.4339
0.9	42.8872	1.9	53.4975
0.9	44.0864	1.9	61.7372
0.9	40.5309	1.9	61.5818
0.9	51.17	1.9	43.216
0.9	60.8646	1.9	69.1407
0.9	46.6914	1.9	49.8907
0.9	42.71	1.9	49.2469
		1.9	46.1519
Averages		1.9	45.2876
%Fat
8wk WT	8wk Mut
46.9369	54.5326
2.3569	3.26991
	0.0312832	pvalue
Total BMD
	8wks
	wt		Mutant
0.9	55.8379	1.9	61.6336
0.9	54.7864	1.9	64.1276
0.9	57.2324	1.9	55.0093
0.9	57.1163	1.9	59.8056
0.9	54.4207	1.9	72.6736
0.9	56.0489	1.9	69.5368
0.9	52.5263	1.9	54.1419
0.9	52.2763	1.9	54.1355
Averages
Total BMD
8wk WT	8wk Mut
55.0306	61.383
0.716796	2.6712
	0.0277533	pvalue
Fe. Length
	8wks
	wt		Mutant
0.9	11.8	1.9	12.2
0.9	13	1.9	12.2
0.9	13.6	1.9	13
0.9	12.7	1.9	13.7
0.9	13.6	1.9	13.6
0.9	14	1.9	12.3
0.9	14.4	1.9	13.2
0.9	13.6	1.9	11.8
0.9	13.3
Averages
Fe. Length
8wk WT	8wk Mut
13.3333	12.75
0.254406	0.271052
	0.1265	pvalue
Femur BMD
	8wks
	wt		Mutant
0.9	71.9756	1.9	96.6901
0.9	71.3261	1.9	99.2785
0.9	73.1797	1.9	78.3905
0.9	78.2461	1.9	83.0367
0.9	79.0619	1.9	84.8072
0.9	83.4048	1.9	88.985
0.9	76.102	1.9	83.8215
0.9	76.3695	1.9	102.1
		1.9	79.8101
		1.9	79.5882
Averages
Fe BMD
8wk WT	8wk Mut
76.2082	87.6508
1.53228	3.29441
	0.00355293	pvalue
