# Supplementary material for: Contrasting effects of Ksr2, an obesity gene, on trabecular bone volume and bone marrow adiposity
Source: eLife. 2022 Nov 7;11:e82810. doi: 10.7554/eLife.82810 (PMC9640193; doi:10.7554/eLife.82810)
Supplement: Figure 3—source data 2. — Source data for Figure 3I and J. [file elife-82810-fig3-data2.xlsx]

## Sheet: Alizarin Red- femur
Source Data for Figure 3I-3J
Individual Samples
BA/TA
	15wks
	wt		ko
0.9	8.69141	1.9	10.7675
0.9	9.2315	1.9	15.5508
0.9	10.3859	1.9	11.7434
0.9	8.20403	1.9	25.7201
0.9	9.35355	1.9	17.9242
0.9	8.78501	1.9	10.3542
Averages
BA/TA
15wk wt	15wk ko
9.10856	15.3434
0.3057	2.40257
	0.0276854	pvalue
OA/BA
	15wks
	wt		ko
0.9	4.37363	1.9	3.3469
0.9	4.95881	1.9	3.17536
0.9	3.52498	1.9	1.4991
0.9	1.35406	1.9	0.663278
0.9	4.56616	1.9	1.26352
0.9	4.79338	1.9	3.25912
Averages
OA/BA
15wk wt	15wk ko
3.9285	2.20121
0.553921	0.487107
	0.0412221	pvalue
