# Supplementary material for: Contrasting effects of Ksr2, an obesity gene, on trabecular bone volume and bone marrow adiposity
Source: eLife. 2022 Nov 7;11:e82810. doi: 10.7554/eLife.82810 (PMC9640193; doi:10.7554/eLife.82810)
Supplement: Figure 3—source data 3. — Source data for Figure 3L–N. [file elife-82810-fig3-data3.xlsx]

## Sheet: Histomorphometry
Source Data for Figure 3L-3N
Histomorphometric measurements of Calcein injections and TRAP staining osteoclasts
Individual Samples
BFR/BS
	8wks
	wt		Mut
0.9	0.1973	1.9	0.4318
0.9	0.4276	1.9	0.44
0.9	0.2155	1.9	0.5309
0.9	0.438	1.9	0.4334
0.9	0.2086	1.9	0.5519
		1.9	0.3937
Averages
BFR/BS
8wk wt	8wk Mut
0.2974	0.463617
0.0553775	0.0256206
	0.0177971	pvalue
MAR
	8wks
	wt		Mut
0.9	1.4164	1.9	1.7638
0.9	1.434	1.9	2.4178
0.9	1.326	1.9	1.5078
0.9	1.2373	1.9	1.6712
		1.9	1.5269
Averages
MAR
8wk wt	8wk Mut
1.35343	1.7775
0.0453646	0.166885
	0.0643952	pvalue
OC.S/BS
	8wks
	wt		Mut
0.9	11.6242	1.9	24.3851
0.9	12.4003	1.9	23.691
0.9	20.7072	1.9	22.0923
0.9	14.8849	1.9	15.7625
0.9	24.8912	1.9	17.5935
0.9	17.3508	1.9	21.3991
0.9	24.3907	1.9	19.0126
		1.9	15.5701
Averages
OC.S/BS
8wk wt	8wk Mut
18.0356	19.9383
2.05741	1.22112
	0.426986	pvalue
