# Supplementary material for: Contrasting effects of Ksr2, an obesity gene, on trabecular bone volume and bone marrow adiposity
Source: eLife. 2022 Nov 7;11:e82810. doi: 10.7554/eLife.82810 (PMC9640193; doi:10.7554/eLife.82810)
Supplement: Figure 3—source data 4. — Source data for Figure 3O and P. [file elife-82810-fig3-data4.xlsx]

## Sheet: Serum ELISAs
Source Data for Figure 3O-3P
KSR2 SERUM ELISA ASSAYS
	P1NP			CTX-1
		ng/ml			ng/ml
	Geno	conc (adjusted)		Genotype	conc (adjusted)
	WT	60.6188		WT	28.4219
	WT	47.3615		WT	34.5598
	WT	73.0291		WT	22.0586
	WT	74.2409		WT	31.4714
	WT	72.8587		WT	27.8705
	avg	65.6218		WT	26.4648
	sd	11.6189		WT	21.3803
	sem	5.19614		avg	27.4611
				sd	4.73854
	Mutant	96.0289		sem	1.791
	Mutant	81.6784
	Mutant	78.2843		Mutant	24.0641
	Mutant	76.4004		Mutant	26.0738
	Mutant	91.2778		Mutant	21.7176
	avg	84.734		Mutant	29.3374
	sd	8.52612		Mutant	32.5499
	sem	3.813		Mutant	33.9045
	t-test	0.0179971		avg	27.9412
				sd	4.81669
				sem	1.9664
				t-test	0.859831
