# Supplementary material for: Contrasting effects of Ksr2, an obesity gene, on trabecular bone volume and bone marrow adiposity
Source: eLife. 2022 Nov 7;11:e82810. doi: 10.7554/eLife.82810 (PMC9640193; doi:10.7554/eLife.82810)
Supplement: Figure 3—source data 5. — Average fold changes plotted and t-test values are highlighted in yellow. Source data for Figure 3S. [file elife-82810-fig3-data5.xlsx]

## Sheet: Alpl
Source Data for Figure 3S								PPIA	2020-01-02	JL
								ALPL	2020-01-02	JL
RNA Extractions done by JL
Original Nano and dilutions by JL
Mice were 12 wks old at termination
Control	ALPL	PPIA	∆Ct	Mutant	ALPL	PPIA	∆Ct	∆∆Ct
M/601	20.7917	15.2816	5.51001	M/613	20.3731	15.2059	5.16726	0.0267614	0.981621
M/607	20.3648	15.2216	5.14328	M/619	20.9108	15.274	5.63681	0.496304	0.708921
F/640	20.2188	15.3022	4.91662	F/634	19.1843	15.0332	4.15111	-0.989391	1.98535
F/642	19.713	15.1704	4.54259	F/638	19.5534	15.2769	4.27652	-0.863987	1.82006
M/643	21.5563	15.5839	5.97244	M/795	20.6882	15.1255	5.56264	0.42214	0.746317
M/654	20.2169	14.9185	5.29838
F/646
F/722	20.0833	15.0216	5.06175
F/724	19.9427	15.2638	4.67896
Average	20.3609	15.2204	5.1405	Average	20.142	15.1831	4.95887	-0.181634	1.24845
Median	20.2179	15.2427	5.10252	Median	20.3731	15.2059	5.16726	0.0267614	0.981621
SD	0.576588	0.199146	0.459882	SD	0.742694	0.104125	0.704565	0.704565	0.609135
	P value								0.304568
ALP	0.561776		F/646	18.913	15.2662
PPIA	0.708822							PPIA	ALP
Ct	0.581714						Blank	31.5902	36.2888
Relative Fold	0.273457						Blank	31.6995	Undetermined
Fold Incr	1.13417

## Sheet: Bglap2
Source Data for Figure 3S								PPIA	2020-01-02
								Bglap2	2020-01-02
RNA Extractions done by JL
Original Nano and dilutions by JL
Mice were 12 wks old at termination
Control	Bglap2	PPIA	∆Ct	Mutant	Bglap2	PPIA	∆Ct	∆∆Ct
M/601				M/613	17.9429	15.2059	2.73702	0.243191	0.844875
M/607	17.7317	15.2216	2.51016	M/619	17.4554	15.274	2.18136	-0.312474	1.24184
F/640	17.7132	15.3022	2.41102	F/634	16.3391	15.0332	1.30584	-1.18799	2.27835
F/642	17.2776	15.1704	2.10718	F/638	16.9981	15.2769	1.72113	-0.7727	1.70846
M/643				M/795	18.0202	15.1255	2.89468	0.400846	0.757414
M/654	17.907	14.9185	2.98853
F/646	16.4513	15.2662	1.1851
F/722	18.1845	15.0216	3.16298
F/724	18.3556	15.2638	3.09185
Average	17.6601	15.1663	2.49383	Average	17.3511	15.1831	2.16801	-0.325825	1.36619
Median	17.7317	15.2216	2.51016	Median	17.4554	15.2059	2.18136	-0.312474	1.24184
SD	0.637088	0.143398	0.697559	SD	0.699584	0.104125	0.669893	0.669893	0.633842
	P value								0.283463
OC	0.444371		M/601	19.6368	15.2816	4.35516
PPIA	0.828623		M/643	20.2739	15.5839	4.69003		PPIA	OC
Ct	0.436564						Blank	31.5902	30.3769
Relative Fold	0.118383						Blank	31.6995	30.8404
Fold Incr	1.25338

## Sheet: Spp1
Source Data for Figure 3S								PPIA	2020-01-02	JL
								Spp1	2020-01-03	JL
RNA Extractions done by JL
Original Nano and dilutions by JL
Mice were 12 wks old at termination
Control	Spp1	PPIA	∆Ct	Mutant	Spp1	PPIA	∆Ct	∆∆Ct
M/601				M/613
M/607	17.1512	15.2216	1.92964	M/619	16.8612	15.274	1.5872	-0.575174	1.48986
F/640	17.0924	15.3022	1.79018	F/634	16.7662	15.0332	1.73294	-0.429432	1.3467
F/642				F/638	16.5391	15.2769	1.26221	-0.90016	1.86627
M/643	18.1632	15.5839	2.57931	M/795	16.6674	15.1255	1.5419	-0.620477	1.53738
M/654	17.7358	14.9185	2.81732
F/646
F/722	16.9316	15.0216	1.91001
F/724	17.2116	15.2638	1.94779
Average	17.381	15.2186	2.16237	Average	16.7085	15.1774	1.53106	-0.631311	1.56005
Median	17.1814	15.2427	1.93871	Median	16.7168	15.1998	1.56455	-0.597826	1.51362
SD	0.469997	0.232956	0.425493	SD	0.137863	0.119333	0.196896	0.196896	0.219644
	P value								0.109822
Osteopontin	0.0256842
PPIA	0.755888		M/601	16.6355	15.2816			PPIA	Osteopontin
Ct	0.025569		F/642	16.3709	15.1704		Blank	31.5902	Undetermined
Relative Fold	0.188716		F/646	16.3107	15.2662		Blank	31.6995	Undetermined
Fold Incr	1.54897		M/613	15.9877	15.2059

## Sheet: Sp7
Source Data for Figure 3S								PPIA	2020-01-02
								Osx	2020-01-02
RNA Extractions done by JL
Original Nano and dilutions by JL
Mice were 12 wks old at termination
Control	Osx	PPIA	∆Ct	Mutant	Osx	PPIA	∆Ct	∆∆Ct
M/601	24.4519	15.2816	9.17027	M/613	23.673	15.2059	8.46712	-0.277541	1.21213
M/607	24.0274	15.2216	8.80583	M/619	23.7644	15.274	8.49035	-0.254315	1.19277
F/640	24.0654	15.3022	8.7632	F/634	23.0991	15.0332	8.06585	-0.678816	1.60083
F/642	23.8845	15.1704	8.71405	F/638	23.432	15.2769	8.15507	-0.589598	1.50483
M/643				M/795
M/654	24.1033	14.9185	9.18484
F/646	23.3067	15.2662	8.04055
F/722	23.7479	15.0216	8.72635
F/724	23.816	15.2638	8.55223
Average	23.9254	15.1807	8.74466	Average	23.4921	15.1975	8.2946	-0.450068	1.37764
Median	23.9559	15.2427	8.74478	Median	23.5525	15.2399	8.31109	-0.43357	1.35848
SD	0.330968	0.138881	0.361162	SD	0.297179	0.114345	0.215931	0.215931	0.206204
	P value								0.103102
Osx	0.0521913		M/643	25.5727	15.5839
PPIA	0.83972		M/795	24.3676	15.1255			PPIA	Osx
Ct	0.0469715						Blank	31.5902	38.4078
Relative Fold	0.0548197						Blank	31.6995	Undetermined
Fold Incr	1.3661

## Sheet: Acp5
Source Data for Figure 3S								PPIA	2020-01-02
								Acp5	2020-01-02
RNA Extractions done by JL
Original Nano and dilutions by JL
Mice were 12 wks old at termination
Control	Acp5	PPIA	∆Ct	Mutant	Acp5	PPIA	∆Ct	∆∆Ct
M/601	17.6566	15.2816	2.37499	M/613	18.0028	15.2059	2.79689	0.211358	0.863724
M/607	17.901	15.2216	2.67947	M/619	17.7186	15.274	2.4446	-0.140932	1.10262
F/640	17.5872	15.3022	2.28498	F/634	17.9734	15.0332	2.94019	0.35466	0.782054
F/642	17.4371	15.1704	2.26666	F/638	18.1667	15.2769	2.88977	0.304238	0.80987
M/643				M/795	17.6643	15.1255	2.53878	-0.0467565	1.03294
M/654	18.7497	14.9185	3.83124
F/646	17.3444	15.2662	2.07822
F/722	17.6979	15.0216	2.67632
F/724	17.7562	15.2638	2.49238
Average	17.7663	15.1807	2.58553	Average	17.9052	15.1831	2.72205	0.136514	0.918241
Median	17.6773	15.2427	2.43369	Median	17.9734	15.2059	2.79689	0.211358	0.863724
SD	0.434343	0.138881	0.543959	SD	0.209396	0.104125	0.219023	0.219023	0.141787
	P value								0.0708933
Trap	0.522412		M/643	19.2033	15.5839
PPIA	0.974379							PPIA	Trap
Ct	0.608033						Blank	31.5902	28.5926
Relative Fold	0.126407						Blank	31.6995	30.7284
Fold Incr	0.909715

## Sheet: Ctsk
Source Data for Figure 3S								PPIA	2020-01-02	JL
								CathK	2020-01-02	JL
RNA Extractions done by JL
Original Nano and dilutions by JL
Mice were 12 wks old at termination
Control	CathK	PPIA	∆Ct	Mutant	CathK	PPIA	∆Ct	∆∆Ct
M/601	17.4049	15.2816	2.12326	M/613	17.502	15.2059	2.29617	-0.131419	1.09537
M/607	18.3691	15.2216	3.14754	M/619	17.9564	15.274	2.68234	0.254749	0.838133
F/640	17.6593	15.3022	2.3571	F/634	17.6808	15.0332	2.64759	0.220005	0.858562
F/642	17.3233	15.1704	2.15291	F/638	17.8003	15.2769	2.52334	0.0957546	0.935783
M/643				M/795	17.698	15.1255	2.57244	0.144855	0.90447
M/654
F/646	17.4434	15.2662	2.17717
F/722	17.726	15.0216	2.70442
F/724	17.5945	15.2638	2.3307
Average	17.6458	15.2182	2.42759	Average	17.7275	15.1831	2.54438	0.116789	0.926464
Median	17.5945	15.2638	2.3307	Median	17.698	15.2059	2.57244	0.144855	0.90447
SD	0.350096	0.0969744	0.374186	SD	0.167002	0.104125	0.152089	0.152089	0.101874
	P value								0.0509369
CathK	0.64189		M/643	19.509	15.5839
PPIA	0.562062		M/654	19.1346	14.9185			PPIA	CathK
Ct	0.528407						Blank	31.5902	26.4997
Relative Fold	0.0722953						Blank	31.6995	27.318
Fold Incr	0.922238
