# Supplementary material for: Contrasting effects of Ksr2, an obesity gene, on trabecular bone volume and bone marrow adiposity
Source: eLife. 2022 Nov 7;11:e82810. doi: 10.7554/eLife.82810 (PMC9640193; doi:10.7554/eLife.82810)
Supplement: Figure 4—source data 1. — Average fold changes plotted and t-test values are highlighted in yellow. Source data for Figure 4B and C. [file elife-82810-fig4-data1.xlsx]

## Sheet: PPARg
Source Data for Figure 4B-4C									2022-02-03	PPIA	DL
									2022-02-03	PPARg	DL
BF = Brown fat
WF = White fat
WF WT	PPARg	PPIA	∆Ct	WF Mut	PPARg	PPIA	∆Ct	∆∆Ct	Fold ∆
1	15.7934	14.8026	0.990788	1	15.5812	14.5487	1.03249	0.0839469	0.943473
2	15.5612	14.6319	0.929318	2
3	15.5069	14.7617	0.745182	3	15.8108	14.5745	1.23636	0.287813	0.819143
4	15.8017	14.6728	1.12889	4	15.7346	14.5477	1.18687	0.238325	0.847729
Average	15.6658	14.7172	0.948545	Average	15.7089	14.557	1.15191	0.203362	0.870115
Median	15.6773	14.7173	0.960053	Median	15.7346	14.5487	1.18687	0.238325	0.847729			PPIA	PPARg
SD	0.153801	0.0785709	0.159201	SD	0.116975	0.0151839	0.106335	0.106335	0.0651179		Blank	30.6377	37.895
	P value								0.0325589		Blank	Undetermined	Undetermined
PPARg	0.704206
PPIA	0.0191214
Ct	0.116518
Relative Fold	0.0959121
Fold Incr	0.868524
BF WT	PPARg	PPIA	∆Ct	BF Mut	PPARg	PPIA	∆Ct	∆∆Ct	Fold ∆
1	15.6762	14.8087	0.867497	1	15.4394	14.6086	0.830736	-0.0565464	1.03997
2	16.2647	14.967	1.29776	2	15.6771	14.7101	0.966979	0.0796964	0.946257
3	15.4956	14.7978	0.697815	3	15.5805	14.5887	0.991822	0.10454	0.930102
4	15.6495	14.9635	0.68606	4	15.7338	14.6478	1.08601	0.198727	0.871319
Average	15.7715	14.8842	0.887283	Average	15.6077	14.6388	0.968887	0.0816042	0.946913
Median	15.6629	14.8861	0.782656	Median	15.6288	14.6282	0.979401	0.092118	0.938179
SD	0.338298	0.0936305	0.285931	SD	0.12884	0.0535157	0.105409	0.105409	0.0698993
	P value								0.0349497
PPARg	0.400337
PPIA	0.00388691
Ct	0.611521
Relative Fold	0.0349739
Fold Incr	0.945006

## Sheet: CEBPa
Source Data for Figure 4B-4C									2022-02-03	PPIA	DL
									2022-02-03	CEBPa	DL
BF = Brown fat
WF = White fat
WF WT	CEBPa	PPIA	∆Ct	WF Mut	CEBPa	PPIA	∆Ct	∆∆Ct	Fold ∆
1	16.0035	14.8026	1.20094	1	15.9389	14.5487	1.3902	0.152101	0.899939
2	15.632	14.6319	1.00011	2
3	15.6609	14.7617	0.899217	3	16.2131	14.5745	1.63866	0.400561	0.757563
4	16.525	14.6728	1.85212	4	16.2477	14.5477	1.69999	0.461894	0.726032
Average	15.9553	14.7172	1.2381	Average	16.1332	14.557	1.57628	0.338185	0.794512
Median	15.8322	14.7173	1.10052	Median	16.2131	14.5487	1.63866	0.400561	0.757563			PPIA	CEBPa
SD	0.415555	0.0785709	0.428128	SD	0.16921	0.0151839	0.164046	0.164046	0.092654		Blank	30.6377	33.1745
	P value								0.046327		Blank	Undetermined	Undetermined
CEBPa	0.522847
PPIA	0.0191214
Ct	0.258571
Relative Fold	0.252236
Fold Incr	0.791036
BF WT	CEBPa	PPIA	∆Ct	BF Mut	CEBPa	PPIA	∆Ct	∆∆Ct	Fold ∆
1	16.5775	14.8087	1.76875	1	15.7607	14.6086	1.15207	-0.161232	1.11824
2	16.494	14.967	1.52707	2	16.1979	14.7101	1.48778	0.17448	0.886087
3	15.8834	14.7978	1.08561	3	15.9817	14.5887	1.39298	0.0796781	0.946269
4	15.8353	14.9635	0.871771	4	16.4637	14.6478	1.81585	0.502547	0.70586
Average	16.1975	14.8842	1.3133	Average	16.101	14.6388	1.46217	0.148868	0.914114
Median	16.1887	14.8861	1.30634	Median	16.0898	14.6282	1.44038	0.127079	0.916178
SD	0.392519	0.0936305	0.408218	SD	0.300532	0.0535157	0.27489	0.27489	0.170154
	P value								0.0850772
CEBPa	0.709595
PPIA	0.00388691
Ct	0.567355
Relative Fold	0.179571
Fold Incr	0.901958

## Sheet: Leptin
Source Data for Figure 4B-4C									2022-02-03	PPIA	DL
									2022-03-02	Leptin	DL
BF = Brown fat
WF = White fat
*New cDNA from 3/1/22
WF WT	Leptin	PPIA	∆Ct	WF Mut	Leptin	PPIA	∆Ct	∆∆Ct	Fold ∆
1	16.925	15.7217	1.20332	1	15.1159	15.4949	-0.37901	-1.90816	3.7533
2	17.1449	15.6816	1.46333	2
3	16.7136	15.3552	1.35838	3	15.3972	15.4345	-0.0372953	-1.56645	2.96174
4	17.8606	15.769	2.09158	4	15.2871	15.487	-0.199897	-1.72905	3.31509
Average	17.161	15.6319	1.52915	Average	15.2667	15.4721	-0.205401	-1.73455	3.34338
Median	17.035	15.7016	1.41085	Median	15.2871	15.487	-0.199897	-1.72905	3.31509			PPIA	Leptin
SD	0.49852	0.187874	0.389867	SD	0.141737	0.0328362	0.170924	0.170924	0.396538		Blank	37.9521	Undetermined
	P value								0.198269		Blank	36.3747	Undetermined
Leptin	0.00152953
PPIA	0.21409
Ct	0.00086979
Relative Fold	2.44493
Fold Incr	3.32776
BF WT	Leptin	PPIA	∆Ct	BF Mut	Leptin	PPIA	∆Ct	∆∆Ct	Fold ∆
1	22.9028	15.6493	7.25349	1
2				2	20.2704	15.5854	4.68499	-2.44665	5.45148
3	23.271	15.5976	7.67346	3	20.3474	15.657	4.69037	-2.44126	5.43116
4	22.6084	16.1404	6.46795	4	18.73	14.821	3.90907	-3.22256	9.33444
Average	22.9274	15.7958	7.13163	Average	19.7826	15.3545	4.42814	-2.70349	6.73903
Median	22.9028	15.6493	7.25349	Median	20.2704	15.5854	4.68499	-2.44665	5.45148
SD	0.331997	0.299604	0.611919	SD	0.91236	0.463402	0.449539	0.449539	2.24772
	P value								1.12386
Leptin	0.00495902
PPIA	0.238228
Ct	0.00351007
Relative Fold	5.0803
Fold Incr	6.51376

## Sheet: Cfd_Adipsin
Source Data for Figure 4B-4C									2022-02-03	PPIA	DL
									2022-02-03	Cfd	DL
BF = Brown fat
WF = White fat
WF WT	Cfd	PPIA	∆Ct	WF Mut	Cfd	PPIA	∆Ct	∆∆Ct	Fold ∆
1	14.6464	14.8026	-0.156195	1	15.4194	14.5487	0.870732	0.981968	0.506288
2	14.5149	14.6319	-0.116921	2
3	14.3616	14.7617	-0.400116	3	16.2292	14.5745	1.65472	1.76596	0.294032
4	14.9011	14.6728	0.228288	4	15.9522	14.5477	1.40446	1.5157	0.349727
Average	14.606	14.7172	-0.111236	Average	15.8669	14.557	1.30997	1.42121	0.383349
Median	14.5807	14.7173	-0.136558	Median	15.9522	14.5487	1.40446	1.5157	0.349727			PPIA	Cfd
SD	0.228603	0.0785709	0.258703	SD	0.411571	0.0151839	0.400444	0.400444	0.11005		Blank	30.6377	35.4448
	P value								0.0550251		Blank	Undetermined	32.9834
Cfd	0.0033427
PPIA	0.0191214
Ct	0.00221132
Relative Fold	3.31841
Fold Incr	0.3734
BF WT	Cfd	PPIA	∆Ct	BF Mut	Cfd	PPIA	∆Ct	∆∆Ct	Fold ∆
1	17.2074	14.8087	2.39866	1	19.2505	14.6086	4.64188	2.97482	0.1272
2	16.3083	14.967	1.34136	2	18.8471	14.7101	4.13696	2.46991	0.180502
3	16.2633	14.7978	1.4655	3	20.2223	14.5887	5.63357	3.96652	0.0639672
4	16.4262	14.9635	1.46268	4	19.4115	14.6478	4.76372	3.09667	0.116898
Average	16.5513	14.8842	1.66705	Average	19.4329	14.6388	4.79403	3.12698	0.122142
Median	16.3672	14.8861	1.46409	Median	19.331	14.6282	4.7028	3.03575	0.122049
SD	0.442773	0.0936305	0.491163	SD	0.57734	0.0535157	0.621997	0.621997	0.0477608
	P value								0.0238804
Cfd	0.000214974
PPIA	0.00388691
Ct	0.000219535
Relative Fold	14.0549
Fold Incr	0.114468
