# Supplementary material for: Contrasting effects of Ksr2, an obesity gene, on trabecular bone volume and bone marrow adiposity
Source: eLife. 2022 Nov 7;11:e82810. doi: 10.7554/eLife.82810 (PMC9640193; doi:10.7554/eLife.82810)
Supplement: Figure 4—source data 2. — Source data for Figure 4E. [file elife-82810-fig4-data2.xlsx]

## Sheet: Osmium
Source Data for Figure 4E
1.19.22 Osmium Analysis
Individual Samples
Bone Volume
	Prox WT		Prox KO		Mid WT		Mid KO		Dis WT		Dis KO
0.59	0.2163	0.7	0.1342	0.92	0.0185	1.02	0.0037	1.24	0.2048	1.34	0.1926
0.59	0.3876	0.7	0.1336	0.92	0.042	1.02	0.0018	1.24	0.2798	1.34	0.415
0.59	0.3198	0.7	0.2775	0.92	0.0292	1.02	0.0045	1.24	0.4345	1.34	0.3715
0.59	0.2358	0.7	0.316	0.92	0.0036	1.02	0.0067	1.24	0.475	1.34	0.0839
0.59	0.4781	0.7	0.163	0.92	0.1541	1.02	0.0077	1.24	0.3796	1.34	0.0857
0.59	0.3183	0.7	0.1058	0.92	0.117	1.02	0.013	1.24	0.5129	1.34	0.0183
						1.02	0.0063	1.24	0.1827	1.34	0.1465
										1.34	0.18
Averages
BV
			SEM	pvalue
Prox WT	0.325983		0.0367217
Prox KO	0.18835		0.032789	0.0270272
Mid WT	0.0607333		0.0228513
Mid KO	0.00624286		0.00135609	0.0353715
Dis WT	0.352757		0.0497912
Dis KO	0.186687		0.0528948	0.0348595
