# Supplementary material for: Contrasting effects of Ksr2, an obesity gene, on trabecular bone volume and bone marrow adiposity
Source: eLife. 2022 Nov 7;11:e82810. doi: 10.7554/eLife.82810 (PMC9640193; doi:10.7554/eLife.82810)
Supplement: Figure 4—source data 3. — Source data for Figure 4G. [file elife-82810-fig4-data3.xlsx]

## Sheet: Fat Cells
Source Data for Figure 4G
Individual Samples
	WT		Mut
0.9	77	1.9	43
0.9	47	1.9	36
0.9	35	1.9	39
0.9	33	1.9	19
0.9	51	1.9	5
		1.9	27
	48.6	28.1667
Averages
Mut vs WT
WT	MUT
48.6	28.1667
7.88416	5.83333
	0.0622672	pvalue
# of Fat Cells
