# Supplementary material for: Contrasting effects of Ksr2, an obesity gene, on trabecular bone volume and bone marrow adiposity
Source: eLife. 2022 Nov 7;11:e82810. doi: 10.7554/eLife.82810 (PMC9640193; doi:10.7554/eLife.82810)
Supplement: Figure 4—source data 4. — Average fold changes plotted and t-test values are highlighted in yellow. Source data for Figure 4H. [file elife-82810-fig4-data4.xlsx]

## Sheet: Fabp4
Source Data for Figure 4H								PPIA	2022-01-19
								FabP4	2022-01-19
RNA Extractions done by JL
Original Nano and dilutions by JL
Mice were 12 wks old at termination
Control	FabP4	PPIA	∆Ct	Mutant	FabP4	PPIA	∆Ct	∆∆Ct
M/601	16.3502	15.2281	1.12216	M/613	15.9465	15.2821	0.664432	0.0921725	0.938109
M/607	15.7317	15.2805	0.451227	M/619	15.884	15.2003	0.683662	0.111403	0.925687
F/640	15.3277	15.3361	-0.00838661	F/634	15.6643	15.5839	0.0804024	-0.491857	1.40625
F/642	15.3208	15.0346	0.286199	F/638	15.5765	15.1591	0.41737	-0.154889	1.11334
M/643	16.3957	15.6694	0.726377	M/795	16.2307	14.8385	1.39226	0.820001	0.566442
M/654	15.9794	14.7692	1.2102
F/646	15.363	15.2548	0.108168
F/722	16.1273	15.2049	0.922316
F/724	15.6926	15.3606	0.332068
Average	15.8098	15.2376	0.572259	Average	15.8604	15.2128	0.647625	0.0753661	0.989966
Median	15.7317	15.2548	0.451227	Median	15.884	15.2003	0.664432	0.0921725	0.938109
SD	0.426606	0.243702	0.441922	SD	0.256982	0.267248	0.482395	0.482395	0.306067
	P value								0.136878
FabP4	0.814762
PPIA	0.862835							PPIA	FabP4
Ct	0.771964						Blank	32.2063	31.1408
Relative Fold	0.311098						Blank	32.0059	31.8577
Fold Incr	0.949101

## Sheet: Slc7a10_ASC1
Source Data for Figure 4H								PPIA	2022-01-26
								Slc7a10	2022-03-24
RNA Extractions done by JL
Original Nano and dilutions by JL
Mice were 12 wks old at termination
Control	Slc7a10	PPIA	∆Ct	Mutant	Slc7a10	PPIA	∆Ct	∆∆Ct
M/601				M/613	29.3094	15.1515	14.1579	-0.596905	1.51247
M/607	29.7822	15.0307	14.7515	M/619	30.3764	15.0036	15.3728	0.618015	0.651567
F/640	29.9235	15.2049	14.7186	F/634
F/642	29.767	14.9431	14.8239	F/638	29.7228	14.9891	14.7336	-0.0211695	1.01478
M/643				M/795	31.9241	15.0175	16.9066	2.15179	0.225033
M/654
F/646	28.9286	15.1744	13.7542
F/722	30.8286	14.9749	15.8537
F/724	29.7798	15.1528	14.6269
Average	29.8349	15.0801	14.7548	Average	30.3332	15.0404	15.2928	0.537933	0.850962
Median	29.781	15.0917	14.7351	Median	30.0496	15.0105	15.0532	0.298423	0.833174
SD	0.604509	0.111372	0.668005	SD	1.14799	0.0749328	1.18482	1.18482	0.546496
	P value								0.2444
Leptin	0.39043
PPIA	0.552611							PPIA	Leptin
Ct	0.380239						Blank	34.7875	Undetermined
Relative Fold	2.96788						Blank	30.9021	Undetermined
Fold Incr	0.688757

## Sheet: Ucp1
Source Data for Figure 4H								PPIA	2022-01-26
								UCP1	2022-02-18
RNA Extractions done by JL
Original Nano and dilutions by JL
Mice were 12 wks old at termination
Control	UCP1	PPIA	∆Ct	Mutant	UCP1	PPIA	∆Ct	∆∆Ct
M/601	26.7517	15.0177	11.734	M/613	23.9066	15.1515	8.75516	-1.5575	2.94343
M/607	24.8439	15.0307	9.81327	M/619	26.9892	15.0036	11.9856	1.67295	0.313612
F/640	22.7859	15.2049	7.58101	F/634	27.5164	15.2812	12.2352	1.92259	0.263781
F/642	23.3939	14.9431	8.45078	F/638	22.0252	14.9891	7.03606	-3.2766	9.69072
M/643	28.4356	15.1069	13.3287	M/795	24.5655	15.0175	9.54806	-0.764601	1.6989
M/654	27.4232	14.8208	12.6024
F/646	22.7706	15.1744	7.59627
F/722	25.9157	14.9749	10.9408
F/724	25.9196	15.1528	10.7668
Average	25.36	15.0474	10.3127	Average	25.0006	15.0886	9.91203	-0.400634	2.98209
Median	25.9157	15.0307	10.7668	Median	24.5655	15.0175	9.54806	-0.764601	1.6989
SD	2.05358	0.1246	2.10704	SD	2.26512	0.12571	2.20449	2.20449	3.91036
	P value								1.74877
UCP1	0.767042
PPIA	0.565472							PPIA	UCP1
Ct	0.742938						Blank	34.7875	Undetermined
Relative Fold	3.25389						Blank	30.9021	Undetermined
Fold Incr	1.32009

## Sheet: prdm16
Source Data for Figure 4H								PPIA	2022-01-26
								prdm16	2022-02-04
RNA Extractions done by JL
Original Nano and dilutions by JL
Mice were 12 wks old at termination
Control	prdm16	PPIA	∆Ct	Mutant	prdm16	PPIA	∆Ct	∆∆Ct
M/601	29.4179	15.0177	14.4002	M/613	28.5731	15.1515	13.4216	-0.116691	1.08425
M/607	29.1373	15.0307	14.1066	M/619	28.5628	15.0036	13.5592	0.0208669	0.98564
F/640	28.3395	15.2049	13.1346	F/634	28.7397	15.2812	13.4586	-0.079761	1.05684
F/642	28.2883	14.9431	13.3452	F/638	28.2366	14.9891	13.2475	-0.290876	1.22338
M/643	28.7638	15.1069	13.6569	M/795	29.3433	15.0175	14.3259	0.787541	0.579331
M/654	28.6556	14.8208	13.8347
F/646	28.2252	15.1744	13.0509
F/722	28.4607	14.9749	13.4858
F/724	27.9828	15.1528	12.83
Average	28.5857	15.0474	13.5383	Average	28.6911	15.0886	13.6025	0.064216	0.985888
Median	28.4607	15.0307	13.4858	Median	28.5731	15.0175	13.4586	-0.079761	1.05684
SD	0.459835	0.1246	0.513581	SD	0.407673	0.12571	0.41971	0.41971	0.243106
	P value								0.121553
prdm16	0.677303
PPIA	0.565472							PPIA	prdm16
Ct	0.816113						Blank	34.7875	31.8886
Relative Fold	0.234184						Blank	30.9021	35.2456
Fold Incr	0.956465

## Sheet: ppargamma
Source Data for Figure 4H								PPIA	2022-01-26
								PPARgamma	2022-02-04
RNA Extractions done by JL
Original Nano and dilutions by JL
Mice were 12 wks old at termination
Control	PPARgamma	PPIA	∆Ct	Mutant	PPARgamma	PPIA	∆Ct	∆∆Ct
M/601	19.9812	15.0177	4.96352	M/613	20.3571	15.1515	5.20565	0.312305	0.805354
M/607	19.7431	15.0307	4.71241	M/619	19.8497	15.0036	4.84614	-0.0472032	1.03326
F/640	20.0234	15.2049	4.81852	F/634	21.1795	15.2812	5.89834	1.005	0.498271
F/642	19.7552	14.9431	4.81211	F/638	20.3407	14.9891	5.35156	0.458214	0.727887
M/643	20.3558	15.1069	5.24894	M/795	20.0065	15.0175	4.98903	0.0956916	0.935824
M/654	19.5708	14.8208	4.74998
F/646	19.8532	15.1744	4.67889
F/722
F/724	20.3152	15.1528	5.16237
Average	19.9498	15.0564	4.89334	Average	20.3467	15.0886	5.25814	0.364801	0.800119
Median	19.9172	15.0688	4.81532	Median	20.3407	15.0175	5.20565	0.312305	0.805354
SD	0.277315	0.13	0.212207	SD	0.513908	0.12571	0.407278	0.407278	0.205626
	P value								0.0919585
PPARgamma	0.0946629
PPIA	0.669207							PPIA	PPARgamma
Ct	0.0550989						Blank	34.7875	Undetermined
Relative Fold	0.596105						Blank	30.9021	Undetermined
Fold Incr	0.776576

## Sheet: Cebpa
Source Data for Figure 4H								PPIA	2022-01-26
								Cebpa	2022-02-04
RNA Extractions done by JL
Original Nano and dilutions by JL
Mice were 12 wks old at termination
Control	Cebpa	PPIA	∆Ct	Mutant	Cebpa	PPIA	∆Ct	∆∆Ct
M/601	19.4539	15.0177	4.43615	M/613	19.4894	15.1515	4.33793	-0.0140977	1.00982
M/607	19.4403	15.0307	4.40961	M/619	19.2908	15.0036	4.28721	-0.0648141	1.04595
F/640	19.4449	15.2049	4.24002	F/634	20.2113	15.2812	4.93014	0.578119	0.669837
F/642	18.9803	14.9431	4.03724	F/638	19.7765	14.9891	4.78743	0.435399	0.739489
M/643	19.8214	15.1069	4.71452	M/795	19.1494	15.0175	4.13196	-0.220063	1.16478
M/654	18.9924	14.8208	4.1716
F/646	19.1968	15.1744	4.02244
F/722	19.4701	14.9749	4.49515
F/724	19.7943	15.1528	4.64149
Average	19.3994	15.0474	4.35203	Average	19.5835	15.0886	4.49493	0.142909	0.925976
Median	19.4449	15.0307	4.40961	Median	19.4894	15.0175	4.33793	-0.0140977	1.00982
SD	0.301669	0.1246	0.24972	SD	0.422592	0.12571	0.344422	0.344422	0.211446
	P value								0.0945616
Cebpa	0.359851
PPIA	0.565472							PPIA	Cebpa
Ct	0.386031						Blank	34.7875	Undetermined
Relative Fold	0.237491						Blank	30.9021	Undetermined
Fold Incr	0.905691

## Sheet: Leptin
Source Data for Figure 4H								PPIA	2022-01-26
								Leptin	2022-03-07
RNA Extractions done by JL
Original Nano and dilutions by JL
Mice were 12 wks old at termination
Control	Leptin	PPIA	∆Ct	Mutant	Leptin	PPIA	∆Ct	∆∆Ct
M/601	25.4198	15.0177	10.4021	M/613	26.5132	15.1515	11.3618	0.769335	0.586688
M/607	25.4275	15.0307	10.3969	M/619
F/640	24.8281	15.2049	9.62325	F/634	27.3068	15.2812	12.0257	1.4332	0.370308
F/642	25.8526	14.9431	10.9095	F/638	26.9369	14.9891	11.9478	1.35536	0.390836
M/643				M/795	26.7698	15.0175	11.7523	1.15987	0.447554
M/654
F/646	24.7494	15.1744	9.57504
F/722	26.4935	14.9749	11.5186
F/724	26.8748	15.1528	11.7219
Average	25.6637	15.0712	10.5925	Average	26.8817	15.1098	11.7719	1.17944	0.448846
Median	25.4275	15.0307	10.4021	Median	26.8534	15.0845	11.8501	1.25762	0.419195
SD	0.800023	0.104368	0.844873	SD	0.332692	0.134396	0.2966	0.2966	0.0975285
	P value								0.0436161
Leptin	0.0189611
PPIA	0.606212							PPIA	Leptin
Ct	0.0265868						Blank	34.7875	Undetermined
Relative Fold	2.1787						Blank	30.9021	Undetermined
Fold Incr	0.441522

## Sheet: Cfd_Adipsin
Source Data for Figure 4H								PPIA	2022-01-26
								Adipsin	2022-03-07
RNA Extractions done by JL
Original Nano and dilutions by JL
Mice were 12 wks old at termination
Control	Adipsin	PPIA	∆Ct	Mutant	Adipsin	PPIA	∆Ct	∆∆Ct
M/601	24.515	15.0177	9.49723	M/613	23.6882	15.1515	8.5368	0.434198	0.740105
M/607	24.1973	15.0307	9.16659	M/619	25.0831	15.0036	10.0796	1.97696	0.254024
F/640	20.7227	15.2049	5.51784	F/634	25.3349	15.2812	10.0537	1.95113	0.258614
F/642				F/638	24.5352	14.9891	9.54609	1.44349	0.367678
M/643	23.8117	15.1069	8.70482	M/795	24.9569	15.0175	9.93946	1.83686	0.27993
M/654	24.0156	14.8208	9.19473
F/646	22.0867	15.1744	6.91232
F/722
F/724	22.8775	15.1528	7.72466
Average	23.1752	15.0726	8.1026	Average	24.7197	15.0886	9.63113	1.52853	0.38007
Median	23.8117	15.1069	8.70482	Median	24.9569	15.0175	9.93946	1.83686	0.27993
SD	1.36864	0.131419	1.46476	SD	0.645125	0.12571	0.647986	0.647986	0.206425
	P value								0.0923162
Adipsin	0.042625
PPIA	0.83714							PPIA	Adipsin
Ct	0.0557374						Blank	34.7875	35.2322
Relative Fold	4.73721						Blank	30.9021	33.2893
Fold Incr	0.346631
