# Supplementary material for: Contrasting effects of Ksr2, an obesity gene, on trabecular bone volume and bone marrow adiposity
Source: eLife. 2022 Nov 7;11:e82810. doi: 10.7554/eLife.82810 (PMC9640193; doi:10.7554/eLife.82810)
Supplement: Figure 4—source data 5. — Average fold changes plotted and t-test values are highlighted in yellow. Source data for Figure 4I. [file elife-82810-fig4-data5.xlsx]

## Sheet: Wnt5a
Source Data for Figure 4I								PPIA	2022-01-26
								Wnt5a	2022-01-26
RNA Extractions done by JL
Original Nano and dilutions by JL
Mice were 12 wks old at termination
Control	Wnt5a	PPIA	∆Ct	Mutant	Wnt5a	PPIA	∆Ct	∆∆Ct
M/601	23.1639	15.0177	8.14615	M/613	23.6603	15.1515	8.50884	0.106586	0.928783
M/607	22.7983	15.0307	7.76764	M/619	23.807	15.0036	8.80346	0.401212	0.757222
F/640	22.6001	15.2049	7.39518	F/634	23.4447	15.2812	8.16355	-0.238703	1.17993
F/642	23.3073	14.9431	8.36425	F/638	22.911	14.9891	7.92185	-0.480397	1.39513
M/643	23.9896	15.1069	8.88274
M/654	24.4195	14.8208	9.59871
F/646	22.4415	15.1744	7.26717
F/722	23.828	14.9749	8.85306
F/724	24.4982	15.1528	9.34536
Average	23.4496	15.0474	8.40225	Average	23.4557	15.1063	8.34942	-0.0528255	1.06527
Median	23.3073	15.0307	8.36425	Median	23.5525	15.0775	8.33619	-0.0660587	1.05436
SD	0.769662	0.1246	0.831221	SD	0.392497	0.137716	0.386838	0.386838	0.280164
	P value								0.140082
Wnt5a	0.988408
PPIA	0.460505							PPIA	Wnt5a
Ct	0.907218						Blank	34.7875	37.3586
Relative Fold	0.111564						Blank	30.9021	Undetermined
Fold Incr	1.03729

## Sheet: Wnt5b
Source Data for Figure 4I								PPIA	2022-01-26
								Wnt5b	2022-01-26
RNA Extractions done by JL
Original Nano and dilutions by JL
Mice were 12 wks old at termination
Control	Wnt5b	PPIA	∆Ct	Mutant	Wnt5b	PPIA	∆Ct	∆∆Ct
M/601	30.0245	15.0177	15.0068	M/613	29.6664	15.1515	14.515	-0.575159	1.48984
M/607	29.9846	15.0307	14.9539	M/619	29.335	15.0036	14.3314	-0.75872	1.69199
F/640	30.3352	15.2049	15.1303	F/634	30.2427	15.2812	14.9615	-0.128599	1.09323
F/642	29.9442	14.9431	15.0011	F/638	28.9783	14.9891	13.9892	-1.10092	2.14491
M/643	31.2243	15.1069	16.1174
M/654	30.3626	14.8208	15.5418
F/646	29.272	15.1744	14.0976
F/722	29.847	14.9749	14.8721
Average	30.1243	15.0342	15.0901	Average	29.5556	15.1063	14.4493	-0.64085	1.60499
Median	30.0045	15.0242	15.0039	Median	29.5007	15.0775	14.4232	-0.66694	1.59092
SD	0.557607	0.126314	0.576562	SD	0.537367	0.137716	0.405082	0.405082	0.437509
	P value								0.218754
Wnt5b	0.123171
PPIA	0.385523							PPIA	Wnt5b
Ct	0.0770234						Blank	34.7875	Undetermined
Relative Fold	0.0555865						Blank	30.9021	39.1572
Fold Incr	1.55925

## Sheet: Wnt7b
Source Data for Figure 4I								PPIA	2022-01-26
								Wnt7b	2022-02-10
RNA Extractions done by JL
Original Nano and dilutions by JL
Mice were 12 wks old at termination
Control	Wnt7b	PPIA	∆Ct	Mutant	Wnt7b	PPIA	∆Ct	∆∆Ct
M/601	29.7843	15.0177	14.7666	M/613	29.6638	15.1515	14.5123	-0.238092	1.17943
M/607	29.1262	15.0307	14.0955
F/640	30.7073	15.2049	15.5024	F/634	28.0199	15.2812	12.7387	-2.0117	4.03257
F/642	27.7873	14.9431	12.8442	F/638	27.5698	14.9891	12.5807	-2.16976	4.49949
M/643	31.7528	15.1069	16.646	M/795	28.7499	15.0175	13.7324	-1.01798	2.02508
F/724	29.8007	15.1528	14.6479
Average	29.8264	15.076	14.7504	Average	28.5008	15.1098	13.391	-1.35938	2.93414
Median	29.7925	15.0688	14.7072	Median	28.3849	15.0845	13.2356	-1.51484	3.02882
SD	1.35187	0.0965191	1.28311	SD	0.915187	0.134396	0.904817	0.904817	1.58769
	P value								0.793844
Wnt7b	0.127218
PPIA	0.653447								PPIA	Wnt7b
Ct	0.10593							Blank	34.7875	Undetermined
Relative Fold	0.206631							Blank	30.9021	Undetermined
Fold Incr	2.56575

## Sheet: Wnt8b
Source Data for Figure 4I								PPIA	2022-01-26
								Wnt8b	2022-02-10
RNA Extractions done by JL
Original Nano and dilutions by JL
Mice were 12 wks old at termination
Control	Wnt8b	PPIA	∆Ct	Mutant	Wnt8b	PPIA	∆Ct	∆∆Ct
M/601	25.4194	15.0177	10.4017	M/613	28.8189	15.1515	13.6674	2.93297	0.130944
M/607	25.2489	15.0307	10.2183	M/619	27.0501	15.0036	12.0465	1.3121	0.402734
F/640	24.7885	15.2049	9.58364	F/634	26.575	15.2812	11.2938	0.559369	0.678599
F/642	27.4793	14.9431	12.5362	F/638	27.3412	14.9891	12.3521	1.61765	0.325865
M/643	27.5899	15.1069	12.483	M/795	27.4846	15.0175	12.4671	1.73266	0.300896
M/654	25.8706	14.8208	11.0498
F/646	24.1661	15.1744	8.99177
F/722	25.1683	14.9749	10.1933
F/724	26.305	15.1528	11.1522
Average	25.7818	15.0474	10.7344	Average	27.4539	15.0886	12.3654	1.63095	0.367808
Median	25.4194	15.0307	10.4017	Median	27.3412	15.0175	12.3521	1.61765	0.325865
SD	1.16303	0.1246	1.20463	SD	0.838503	0.12571	0.859613	0.859613	0.200095
	P value								0.0894851
Wnt8b	0.015674
PPIA	0.565472							PPIA	Wnt8b
Ct	0.0210181						Blank	34.7875	Undetermined
Relative Fold	6.20292						Blank	30.9021	Undetermined
Fold Incr	0.322875

## Sheet: Axin2
Source Data for Figure 4I								PPIA	2022-01-19
								Axin2	2022-01-19
RNA Extractions done by JL
Original Nano and dilutions by JL
Mice were 12 wks old at termination
Control	Axin2	PPIA	∆Ct	Mutant	Axin2	PPIA	∆Ct	∆∆Ct
M/601	24.151	15.2281	8.92291	M/613	23.792	15.2821	8.50991	-0.0910134	1.06512
M/607	23.771	15.2805	8.49056
F/640	23.7296	15.3361	8.39353	F/634	24.5044	15.5839	8.92044	0.319511	0.801341
F/642	23.4067	15.0346	8.37212	F/638	23.5693	15.1591	8.41021	-0.190713	1.14133
				M/795	23.7659	14.8385	8.92738	0.326448	0.797498
M/654	23.4846	14.7692	8.71543
F/722	23.916	15.2049	8.711
Average	23.7432	15.1422	8.60093	Average	23.9079	15.2159	8.69199	0.091058	0.951321
Median	23.7503	15.2165	8.60078	Median	23.7789	15.2206	8.71518	0.114249	0.93323
SD	0.27465	0.209152	0.217461	SD	0.409878	0.308486	0.27089	0.27089	0.178146
	P value								0.089073
Axin2	0.464022
PPIA	0.661469							PPIA	Axin2
Ct	0.571168						Blank	32.2063	28.1661
Relative Fold	0.131006						Blank	32.0059	Undetermined
Fold Incr	0.938834

## Sheet: Ccnd1_cyclinD1
Source Data for Figure 4I								PPIA	2022-01-19
								cyclinD1	2022-01-19
RNA Extractions done by JL
Original Nano and dilutions by JL
Mice were 12 wks old at termination
Control	cyclinD1	PPIA	∆Ct	Mutant	cyclinD1	PPIA	∆Ct	∆∆Ct
M/601	23.7226	15.2281	8.49455	M/613	20.3975	15.2821	5.11546	-3.0317	8.17775
M/607	23.3485	15.2805	8.06802	M/619	21.3962	15.2003	6.19586	-1.9513	3.86722
F/640	22.7248	15.3361	7.38877	F/634	23.8123	15.5839	8.22837	0.0812095	0.945265
F/642	23.4213	15.0346	8.38664	F/638	20.4075	15.1591	5.24834	-2.89882	7.45815
M/643	24.238	15.6694	8.56859
F/722	23.4399	15.2049	8.23492
F/724	23.2492	15.3606	7.88862
Average	23.4492	15.302	8.14716	Average	21.5034	15.3064	6.19701	-1.95015	5.1121
Median	23.4213	15.2805	8.23492	Median	20.9018	15.2412	5.7221	-2.42506	5.66268
SD	0.460546	0.194242	0.41061	SD	1.60899	0.19197	1.43714	1.43714	3.3573
	P value								1.67865
cyclinD1	0.0127694
PPIA	0.972226							PPIA	cyclinD1
Ct	0.00697427						Blank	32.2063	36.8383
Relative Fold	0.263177						Blank	32.0059	32.7532
Fold Incr	3.86415

## Sheet: TCF7L2
Source Data for Figure 4I								PPIA	2022-01-26
								TCF7L2-E1	2022-01-27
RNA Extractions done by JL
Original Nano and dilutions by JL
Mice were 12 wks old at termination
Control	TCF7L2-E1	PPIA	∆Ct	Mutant	TCF7L2-E1	PPIA	∆Ct	∆∆Ct
M/601	21.4472	15.0177	6.42947	M/613	22.3902	15.1515	7.23875	0.104232	0.9303
M/607	22.1573	15.0307	7.1266	M/619	22.1941	15.0036	7.19054	0.0560177	0.961916
F/640	21.9284	15.2049	6.72346	F/634	22.5351	15.2812	7.25392	0.119403	0.920569
F/642	22.4999	14.9431	7.55677	F/638	22.3877	14.9891	7.39861	0.264092	0.832723
M/643	22.1339	15.1069	7.02702	M/795	22.2916	15.0175	7.27409	0.139571	0.907789
M/654	22.3629	14.8208	7.54205
F/646	21.8971	15.1744	6.72278
F/722	22.2671	14.9749	7.2922
F/724	22.9432	15.1528	7.79033
Average	22.1819	15.0474	7.13452	Average	22.3597	15.0886	7.27118	0.136663	0.910659
Median	22.1573	15.0307	7.1266	Median	22.3877	15.0175	7.25392	0.119403	0.920569
SD	0.419626	0.1246	0.453671	SD	0.127015	0.12571	0.077621	0.077621	0.0479415
	P value								0.0214401
TCF7L2-E1	0.380698
PPIA	0.565472							PPIA	TCF7L2-E1
Ct	0.523791						Blank	34.7875	30.9182
Relative Fold	0.0459176						Blank	30.9021	30.145
Fold Incr	0.909621
