# Supplementary material for: Contrasting effects of Ksr2, an obesity gene, on trabecular bone volume and bone marrow adiposity
Source: eLife. 2022 Nov 7;11:e82810. doi: 10.7554/eLife.82810 (PMC9640193; doi:10.7554/eLife.82810)
Supplement: Figure 5—source data 1. — Source data for Figure 5D–F. [file elife-82810-fig5-data1.xlsx]

## Sheet: KSR2FractureMicroCT,LD-PIVOT
Source Data for Figure 5D-5F
BV and BV/TV are for Low density bone
Threshold	220
Row Labels	Average of VOX-TV	Sum of VOX-BV	Sum of VOX-BV/TV
KSR2
Mutant
3047	36.4341	8.3882	0.2302
3069	42.7651	7.1681	0.1676
3082	52.6757	8.7967	0.167
3083	46.2924	5.9841	0.1293
3100	42.7592	7.428	0.1737
3102	49.282	6.2915	0.1277
3128	53.7905	9.9297	0.1846
3142	62.2058	10.5492	0.1696
Mutant Average	48.2756	8.06694	0.168712
Mutant StdDev	8.01596	1.64637	0.0322896
WT
3045	25.4489	3.8002	0.1493
3049	38.3165	6.6979	0.1748
3067	31.5075	5.4501	0.173
3068	31.4304	4.2013	0.1337
3073	43.9337	9.4215	0.2144
3078	50.5961	6.7174	0.1328
3098	37.4812	6.5584	0.175
3108	37.6122	5.0502	0.1343
3132	47.7943	5.5567	0.1163
3134	47.9253	7.1991	0.1502
WT Average	39.2046	6.06528	0.15538
WT StdDev	8.28091	1.62928	0.0290042
	TV	BV	BV/TV
T-Test	0.0324573	0.0202175	0.370222

## Sheet: KSR2FractureMicroCT,HD-PIvot
Source Data for Figure 5D-5F
BV and BV/TV are for High density bone
Threshold	570
Row Labels	Average of VOX-TV	Sum of VOX-BV	Sum of VOX-BV/TV
KSR2
Mutant
3047	36.4341	4.4575	0.1223
3069	42.7651	4.8841	0.1142
3082	52.6757	4.8343	0.0918
3083	46.2924	4.2823	0.0925
3100	42.7592	4.5175	0.1057
3102	49.282	4.6206	0.0938
3128	53.7905	5.3552	0.0996
3142	62.2058	4.9611	0.0798
Mutant Average	48.2756	4.73907	0.0999625
Mutant StdDev	8.01596	0.340182	0.0136358
WT
3045	25.4489	4.8891	0.1921
3049	38.3165	4.7761	0.1246
3067	31.5075	5.1357	0.163
3068	31.4304	4.9884	0.1587
3073	43.9337	5.2059	0.1185
3078	50.5961	4.5545	0.09
3098	37.4812	5.2183	0.1392
3108	37.6122	3.5757	0.0951
3132	47.7943	5.2024	0.1088
3134	47.9253	5.0362	0.1051
WT Average	39.2046	4.85823	0.12951
WT StdDev	8.28091	0.498823	0.0331666
	TV	BV	BV/TV
T-Test	0.0324573	0.573027	0.0316703
