# Supplementary material for: Contrasting effects of Ksr2, an obesity gene, on trabecular bone volume and bone marrow adiposity
Source: eLife. 2022 Nov 7;11:e82810. doi: 10.7554/eLife.82810 (PMC9640193; doi:10.7554/eLife.82810)
Supplement: Figure 5—source data 2. — Source data for Figure 5H and J. [file elife-82810-fig5-data2.xlsx]

## Sheet: Saf O
Source Data for Figure 5H
Safranin O quantification
	WT	KO
Values	1.8e-05	0.00037
Values	0.00763	0.004221
Values	0.003281	0.02294
Values	0.008788	0.023846
Values	0.00574	0.056373
Values	0.009876	0.018942
Values	0.00142	0.037518
average	0.00525043	0.0234586
p-value	0.0237106

## Sheet: Acp5_Trap
Source Data for Figure 5J
ACP5/TRAP QUANTIFICATION
	WT	KO
Values	20.5	18.415
Values	16.48	17.795
Values	15.82	23.98
Values	17.04	23.015
Values	20.165	19.3
Values	19.83	24.455
Values	17.34	19.84
Values	27.175	20.9
average	19.2937	20.9625
p-value	0.173782
