# Supplementary material for: Contrasting effects of Ksr2, an obesity gene, on trabecular bone volume and bone marrow adiposity
Source: eLife. 2022 Nov 7;11:e82810. doi: 10.7554/eLife.82810 (PMC9640193; doi:10.7554/eLife.82810)
Supplement: Figure 5—source data 3. — Source data for Figure 5L–N. [file elife-82810-fig5-data3.xlsx]

## Sheet: Quantification
Source Data for Figure 5L-5N
IHC quantification. % area was compared
IBSP		mouse	area	mean	mode	minn	max	intDen	Median	%Area	RawIntDen
	WT	1	1447680	4.172	0	0	255	1165.21	0	1.636	6040440
	WT	8	1447680	3.657	0	0	255	5294055	0	1.434	5294055
	WT	4	1447680	4.105	0	0	255	5942010	0	1.61	5942010
	KO	10	1447680	6.31	0	0	255	9134865	0	2.475	9134865
	KO	15	1447680	11.492	0	0	255	16636965	0	4.507	16636965
	KO	5	1447680	8.701	0	0	255	12596235	0	3.412	12596235
	KO	9	1447680	10.729	0	0	255	15532305	0	4.207	15532305
COL10A1	WT	1	1447680	1.111	0	0	255	1608030	0	0.436	1608030
	WT	8	1447680	1.774	0	0	255	2568105	0	0.696	2568105
	WT	4	1447680	1.33	0	0	255	1925505	0	0.522	1925505
	KO	10	1447680	4.24	0	0	255	6138105	0	1.663	6138105
	KO	15	1447680	5.329	0	0	255	7715280	0	2.09	7715280
	KO	5	1447680	2.43	0	0	255	3518235	0	0.953	3518235
	KO	9	1447680	2.644	0	0	255	3827040	0	1.037	3827040
OSX	WT	1	1447680	19.119	0	0	255	27678465	0	7.498	27678465
	WT	8	1447680	14.842	0	0	255	21486810	0	5.82	21486810
	WT	4	1447680	19.074	0	0	255	27613695	0	7.48	27613695
	KO	10	1447680	14.254	0	0	255	20635365	0	5.59	20635365
	KO	15	1447680	7.831	0	0	255	11336280	0	3.071	11336280
	KO	5	1447680	7.19	0	0	255	10408590	0	2.82	10408590
	KO	9	1447680	7.389	0	0	255	10696485	0	2.898	10696485

## Sheet: t-test COL10A1
Table Analyzed	COL10A1 FX IF
Column B	Ksr2+/+
vs.	vs.
Column A	Ksr2+/+
Unpaired t test
P value	0.0418
P value summary	*
Significantly different (P < 0.05)?	Yes
One- or two-tailed P value?	Two-tailed
t, df	t=2.719, df=5
How big is the difference?
Mean of column A	0.5513
Mean of column B	1.436
Difference between means (B - A) ¬± SEM	0.8844 ¬± 0.3253
95% confidence interval	0.04830 to 1.721
R squared (eta squared)	0.5966
F test to compare variances
F, DFn, Dfd	16.56, 3, 2
P value	0.115
P value summary	ns
Significantly different (P < 0.05)?	No
Data analyzed
Sample size, column A	3
Sample size, column B	4

## Sheet: t-test BSP
Table Analyzed	BSP FX IF
Column B	Ksr2+/+
vs.	vs.
Column A	Ksr2+/+
Unpaired t test
P value	0.0118
P value summary	*
Significantly different (P < 0.05)?	Yes
One- or two-tailed P value?	Two-tailed
t, df	t=3.866, df=5
How big is the difference?
Mean of column A	1.56
Mean of column B	3.65
Difference between means (B - A) ¬± SEM	2.090 ¬± 0.5407
95% confidence interval	0.7003 to 3.480
R squared (eta squared)	0.7493
F test to compare variances
F, DFn, Dfd	68.51, 3, 2
P value	0.0288
P value summary	*
Significantly different (P < 0.05)?	Yes
Data analyzed
Sample size, column A	3
Sample size, column B	4

## Sheet: t-test OSX
Table Analyzed	OSX FX IF
Column B	Ksr2+/+
vs.	vs.
Column A	Ksr2+/+
Unpaired t test
P value	0.0149
P value summary	*
Significantly different (P < 0.05)?	Yes
One- or two-tailed P value?	Two-tailed
t, df	t=3.642, df=5
How big is the difference?
Mean of column A	6.933
Mean of column B	3.595
Difference between means (B - A) ¬± SEM	-3.338 ¬± 0.9164
95% confidence interval	-5.694 to -0.9822
R squared (eta squared)	0.7263
F test to compare variances
F, DFn, Dfd	1.917, 3, 2
P value	0.7217
P value summary	ns
Significantly different (P < 0.05)?	No
Data analyzed
Sample size, column A	3
Sample size, column B	4
