# Supplementary material for: Contrasting effects of Ksr2, an obesity gene, on trabecular bone volume and bone marrow adiposity
Source: eLife. 2022 Nov 7;11:e82810. doi: 10.7554/eLife.82810 (PMC9640193; doi:10.7554/eLife.82810)
Supplement: Figure 5—source data 4. — Source data for Figure 5O–Q. [file elife-82810-fig5-data4.xlsx]

## Sheet: Strength calculations
Source Data for Figure 5O-5Q
KSR2 femur
I.D.	Geno	Pmax	S	U	L	a	b	a'	b'	I	E	CrtThk
3139	WT	-20.5089	95.6777	-2.49459	7	1.25	2	1.25	2	0.152588	4.48067
3286	WT	-27.759	159.707	-2.77951	7	1.22	1.7	1.22	1.7	0.138458	8.2425
3137	WT	-24.0039	143.999	-2.74556	7	1.36	2.16	1.36	2.16	0.213814	4.81257
3482	WT	-23.9178	207.899	-2.00604	7	1.42	1.92	1.42	1.92	0.254117	5.84617
3244	WT	-23.9732	160.284	-4.97339	7	1.33	1.99	1.33	1.99	0.195563	5.85674
3268	WT	-26.4469	148.661	-5.31823	7	1.44	1.83	1.44	1.83	0.268739	3.95293
3326	WT	-25.8811	148.141	-8.86519	7	1.2	1.53	1.2	1.53	0.1296	8.16812
AVG		-24.6415	152.052	-4.16893	7	1.31714	1.87571	1.31714	1.87571	0.193268	5.90853	#DIV/0!
SD		2.34416	32.9518	2.43108	0	0.0960407	0.209671	0.0960407	0.209671	0.0555854	1.71387	#DIV/0!
SEM		0.828785	11.6502	0.859516	0	0.0339555	0.0741299	0.0339555	0.0741299	0.0196524	0.605943	#DIV/0!
I.D.	Geno	Pmax	S	U	L	a	b	a'	b'	I	E	CrtThk
3123	MUT	-16.7278	50.5743	-1.83709	7	1.4	1.52	1.4	1.52	0.2401	1.50519
3196	MUT	-16.3006	88.2654	-2.88384	7	1.1	2	1.1	2	0.091506	6.89277
3131	MUT	-25.5017	84.6308	-1.03088	7	1.31	2.04	1.31	2.04	0.184062	3.28561
3480	MUT	-22.7616	175.138	-1.5718	7	1.23	1.77	1.23	1.77	0.143054	8.74848
3202	MUT	-15.8307	77.2272	-3.72028	7	1.1	1.4	1.1	1.4	0.091506	6.03078
3330	MUT	-22.4663	141.988	-4.55177	7	1.38	1.5	1.38	1.5	0.226671	4.47618
AVG		-19.9315	102.971	-2.59928	7	1.25333	1.705	1.25333	1.705	0.162817	5.1565	#DIV/0!
SD		4.14067	46.241	1.35988	0	0.132916	0.273038	0.132916	0.273038	0.0649037	2.60678	#DIV/0!
SEM		1.46395	16.3487	0.48079	0	0.0469929	0.0965337	0.0469929	0.0965337	0.0229469	0.921635	#DIV/0!
TTEST		0.0257158	0.0474729	0.189235	#DIV/0!	0.337157	0.228378	0.337157	0.228378	0.381201	0.545287	#DIV/0!
	Pmax = Maximum load (N)
	S = Stiffness (N/mm)
	E=Elasticity (GPa)
