# Supplementary material for: Contrasting effects of Ksr2, an obesity gene, on trabecular bone volume and bone marrow adiposity
Source: eLife. 2022 Nov 7;11:e82810. doi: 10.7554/eLife.82810 (PMC9640193; doi:10.7554/eLife.82810)
Supplement: Figure 6—source data 1. — Average fold changes plotted and t-test values are highlighted in yellow. Source data for Figure 6B. [file elife-82810-fig6-data1.xlsx]

## Sheet: Alpl
Source Data for Figure 6B
								PPIA	2019-03-20	FB
RNA Extractions done by JL								Alpl	2019-03-20	FB
Nano, dilutions and RT FB
DAY3 BG	Alpl	PPIA	∆Ct	DAY3 AA	Alpl	PPIA	∆Ct	∆∆Ct
BG 1	21.8637	14.5371	7.32661	AA 1	21.6704	14.7183	6.95208	0.335345	0.792594
BG 2	21.6377	15.317	6.32073	AA 2	21.6491	14.6665	6.98253	0.365788	0.776045
BG 3	21.2491	14.7973	6.45178	AA 3	21.6489	14.9408	6.7081	0.091363	0.938636
BG 4	21.1937	14.8259	6.36783	AA 4	22.0101	14.6642	7.34594	0.729202	0.603237
Average	21.486	14.8693	6.61674	Average	21.7446	14.7475	6.99716	0.380425	0.777628
Median	21.4434	14.8116	6.40981	Median	21.6597	14.6924	6.96731	0.350567	0.78432
SD	0.320025	0.325512	0.476341	SD	0.177306	0.131293	0.262963	0.262963	0.13731
	P value								0.068655
Alpl	0.207237
PPIA	0.513431							PPIA	Alpl
Ct	0.211512						Blank
Relative Fold	0.413948						Blank
Fold Incr	0.768211
DAY7 BG	Alpl	PPIA	∆Ct	DAY7 AA	Alpl	PPIA	∆Ct	∆∆Ct
BG 1	19.8304	14.765	5.06539	AA 1	19.2484	15.246	4.00243	-1.45141	2.73474
BG 2	20.2643	14.7538	5.51048	AA 2	19.4068	15.1413	4.26543	-1.1884	2.27901
BG 3	20.2519	14.6624	5.58951	AA 3	19.7067	15.4757	4.23097	-1.22287	2.3341
BG 4	20.4599	14.81	5.64997	AA 4	19.4275	14.9952	4.4323	-1.02154	2.03008
Average	20.2017	14.7478	5.45384	Average	19.4473	15.2146	4.23278	-1.22105	2.34448
Median	20.2581	14.7594	5.55	Median	19.4171	15.1937	4.2482	-1.20564	2.30655
SD	0.265194	0.0618834	0.265189	SD	0.190498	0.202226	0.176953	0.176953	0.291859
	P value								0.14593
Alpl	0.00361431
PPIA	0.00450006
Ct	0.000258675
Relative Fold	1.09015
Fold Incr	2.33117
DAY14 BG	Alpl	PPIA	∆Ct	DAY14 AA	Alpl	PPIA	∆Ct	∆∆Ct
1	23.0084	14.8491	8.15929	AA 1	17.9709	14.9729	2.99792	-3.03622	8.20339
2	19.4548	14.8901	4.56473	AA 2	17.9616	14.9925	2.96909	-3.06505	8.36898
3	19.948	15.4323	4.5157	AA 3	17.7098	15.0035	2.70633	-3.32782	10.0409
4	21.6058	14.709	6.89686	AA 4	17.5947	15.129	2.46562	-3.56853	11.8641
Average	21.0043	14.9701	6.03415	Average	17.8092	15.0245	2.78474	-3.2494	9.61933
Median	20.7769	14.8696	5.73079	Median	17.8357	14.998	2.83771	-3.19643	9.20494
SD	1.62222	0.317745	1.8005	SD	0.187312	0.0708355	0.249947	0.249947	1.71122
	P value								0.855608
Alpl	0.00786444
PPIA	0.749718
Ct	0.0117111
Relative Fold	8.99674
Fold Incr	9.50972
DAY21 BG	Alpl	PPIA	∆Ct	DAY21 AA	Alpl	PPIA	∆Ct	∆∆Ct
1	20.5418	15.2129	5.32891	AA 1	16.749	15.2742	1.47481	-3.55906	11.7864
2	20.0016	14.8832	5.1184	AA 2	15.7701	15.2071	0.562972	-4.47089	22.1754
3	19.4808	14.8265	4.65427	AA 3	17.3313	15.5683	1.76299	-3.27087	9.6523
4				AA 4	16.3582	14.9641	1.39409	-3.63977	12.4647
Average	20.0081	14.9742	5.03386	Average	16.5521	15.2534	1.29871	-3.73515	14.0197
Median	20.0016	14.8832	5.1184	Median	16.5536	15.2407	1.43445	-3.59941	12.1256
SD	0.530522	0.208625	0.345174	SD	0.657031	0.248618	0.51542	0.51542	5.56764
	P value								2.78382
Alpl	0.000699011
PPIA	0.17815
Ct	0.000120864
Relative Fold	10.3667
Fold Incr	13.3165

## Sheet: Ksr2
Source Data for Figure 6B								PPIA	2019-04-10	SP
								Ksr2	2019-05-07	SP
RNA Extractions done by JL
Nano, dilutions and RT FB
DAY3 BG	Ksr2	PPIA	∆Ct	DAY3 AA	Ksr2	PPIA	∆Ct	∆∆Ct
BG 1	28.9247	14.48	14.4446	AA 1	29.3374	14.4476	14.8897	0.6289	0.646669
BG 2	28.8992	14.4809	14.4184	AA 2	29.4152	14.4219	14.9933	0.732466	0.601874
BG 3	28.2138	14.4849	13.7289	AA 3	29.6317	14.4338	15.1979	0.937027	0.522308
BG 4	28.9738	14.5224	14.4514	AA 4
Average	28.7529	14.492	14.2608	Average	29.4614	14.4345	15.027	0.766131	0.590284
Median	28.9119	14.4829	14.4315	Median	29.4152	14.4338	14.9933	0.732466	0.601874
SD	0.360738	0.0203548	0.35492	SD	0.15251	0.012874	0.156798	0.156798	0.0629854
	P value								0.0314927
Ksr2	0.0257155
PPIA	0.00809877							PPIA	Ksr2
Ct	0.0185905						Blank	18.4933	35.9447
Relative Fold	0.851797						Blank	18.6401	30.8999
Fold Incr	0.587992
DAY7 BG	Ksr2	PPIA	∆Ct	DAY7 AA	Ksr2	PPIA	∆Ct	∆∆Ct
BG 1	28.3841	14.5637	13.8204	AA 1	29.4991	14.9355	14.5637	0.540847	0.687367
BG 2	28.5675	14.5482	14.0193	AA 2
BG 3	28.9458	14.5765	14.3693	AA 3	28.8905	14.7808	14.1097	0.0868361	0.941585
BG 4	28.5201	14.6377	13.8824	AA 4	28.2506	14.7495	13.5011	-0.521711	1.43566
Average	28.6044	14.5815	14.0228	Average	28.8801	14.8219	14.0582	0.035324	1.02154
Median	28.5438	14.5701	13.9508	Median	28.8905	14.7808	14.1097	0.0868361	0.941585
SD	0.240549	0.0392162	0.24547	SD	0.62434	0.0995682	0.533149	0.533149	0.380498
	P value								0.190249
Ksr2	0.446004
PPIA	0.00638932
Ct	0.90955
Relative Fold	0.323161
Fold Incr	0.975813
DAY14 BG	Ksr2	PPIA	∆Ct	DAY14 AA	Ksr2	PPIA	∆Ct	∆∆Ct
BG 1	29.9912	14.57	15.4212	AA 1	27.7129	14.7785	12.9343	-2.19375	4.57494
BG 2	29.5417	14.592	14.9496	AA 2
BG 3	29.5034	14.594	14.9093	AA 3	27.8011	14.7495	13.0516	-2.07648	4.21776
BG 4	29.8044	14.5723	15.2321	AA 4	26.8018	14.7672	12.0346	-3.09344	8.5353
Average	29.7101	14.5821	15.1281	Average	27.4386	14.7651	12.6735	-2.45456	5.776
Median	29.673	14.5822	15.0909	Median	27.7129	14.7672	12.9343	-2.19375	4.57494
SD	0.230207	0.0127133	0.242504	SD	0.553214	0.0146514	0.556389	0.556389	2.39629
	P value								1.19814
Ksr2	0.000636664
PPIA	1.05047e-05
Ct	0.000476816
Relative Fold	3.60304
Fold Incr	5.48145
DAY21 BG	Ksr2	PPIA	∆Ct	DAY21 AA	Ksr2	PPIA	∆Ct	∆∆Ct
BG 1	27.9423	14.7275	13.2147	AA 1
BG 2	27.7997	14.6706	13.1291	AA 2	27.2905	14.8018	12.4888	-1.1205	2.17422
BG 3	28.8673	14.6685	14.1987	AA 3	28.193	14.8573	13.3357	-0.273583	1.20881
BG 4	28.5832	14.6887	13.8945	AA 4	27.7668	14.777	12.9898	-0.619412	1.53625
Average	28.2981	14.6888	13.6093	Average	27.7501	14.812	12.9381	-0.671164	1.63976
Median	28.2627	14.6796	13.5546	Median	27.7668	14.8018	12.9898	-0.619412	1.53625
SD	0.509991	0.027336	0.521245	SD	0.451447	0.0411128	0.425821	0.425821	0.490958
	P value								0.245479
Ksr2	0.201003
PPIA	0.00484168
Ct	0.129966
Relative Fold	0.0601929
Fold Incr	1.59236

## Sheet: Ksr1
Source Data for Figure 6B								PPIA	2019-06-18	SP
								Ksr1	2019-06-18	SP
RNA Extractions done by JL
Nano, dilutions and RT FB
DAY3 BG	Ksr1	PPIA	∆Ct	DAY3 AA	Ksr1	PPIA	∆Ct	∆∆Ct
BG 1	23.6983	14.49	9.20831	AA 1	23.5483	14.5131	9.0352	-0.143931	1.10491
BG 2	23.9478	14.4696	9.47822	AA 2	23.2671	14.4938	8.77333	-0.405797	1.32482
BG 3	23.4274	14.484	8.94349	AA 3	23.8222	14.4891	9.33313	0.154003	0.898753
BG 4	23.6116	14.5251	9.08648	AA 4	23.8312	14.5321	9.29913	0.119999	0.920188
Average	23.6713	14.4922	9.17913	Average	23.6172	14.507	9.1102	-0.0689316	1.06217
Median	23.6549	14.487	9.1474	Median	23.6853	14.5034	9.16716	-0.011966	1.01255
SD	0.216205	0.0235693	0.226873	SD	0.267797	0.019685	0.261086	0.261086	0.198054
	P value								0.0990269
Ksr1	0.763894
PPIA	0.371298							PPIA	Ksr1
Ct	0.704						Blank	35.839	Undetermined
Relative Fold	0.0369233						Blank	28.5524	Undetermined
Fold Incr	1.04894
DAY7 BG	Ksr1	PPIA	∆Ct	DAY7 AA	Ksr1	PPIA	∆Ct	∆∆Ct
BG 1	23.6499	14.5628	9.08715	AA 1	24.6091	14.7465	9.86258	0.339185	0.790488
BG 2	24.0085	14.5973	9.41115	AA 2	24.4032	14.7091	9.69415	0.17076	0.888375
BG 3	24.4192	14.6911	9.72813	AA 3	25.9505	14.9384	11.012	1.48865	0.356345
BG 4	24.5091	14.642	9.86714	AA 4	25.1338	14.8285	10.3053	0.78195	0.58158
Average	24.1467	14.6233	9.52339	Average	25.0241	14.8056	10.2185	0.695137	0.654197
Median	24.2139	14.6197	9.56964	Median	24.8715	14.7875	10.084	0.560567	0.686034
SD	0.396451	0.0556285	0.347842	SD	0.689914	0.101617	0.588467	0.588467	0.236223
	P value								0.118111
Ksr1	0.0695773
PPIA	0.0198776
Ct	0.0881984
Relative Fold	1.64764
Fold Incr	0.617651
DAY14 BG	Ksr1	PPIA	∆Ct	DAY14 AA	Ksr1	PPIA	∆Ct	∆∆Ct
BG 1	24.606	14.8003	9.80571	AA 1
BG 2	24.6219	14.5914	10.0304	AA 2	24.4067	14.6544	9.75235	-0.174913	1.1289
BG 3	24.459	14.6945	9.76452	AA 3	25.0362	15.1185	9.91771	-0.00955367	1.00664
BG 4	24.7565	14.6481	10.1084	AA 4	24.3171	14.7626	9.55444	-0.372819	1.29488
Average	24.6108	14.6836	9.92726	Average	24.5866	14.8451	9.7415	-0.185762	1.14347
Median	24.6139	14.6713	9.91808	Median	24.4067	14.7626	9.75235	-0.174913	1.1289
SD	0.121674	0.0884773	0.168035	SD	0.391873	0.242808	0.181875	0.181875	0.14467
	P value								0.072335
Ksr1	0.909581
PPIA	0.263943
Ct	0.220349
Relative Fold	1.51049e-05
Fold Incr	1.13742
DAY21 BG	Ksr1	PPIA	∆Ct	DAY21 AA	Ksr1	PPIA	∆Ct	∆∆Ct
BG 1	24.1946	14.6883	9.50627	AA 1	23.7878	14.8131	8.97474	-0.405191	1.32426
BG 2	24.577	14.705	9.87203	AA 2	23.9884	14.8122	9.1762	-0.203733	1.15167
BG 3	23.7953	14.7333	9.06199	AA 3	23.6267	14.6712	8.95557	-0.424368	1.34198
BG 4	23.8377	14.7582	9.07945	AA 4	23.5431	14.7214	8.82165	-0.558289	1.47252
Average	24.1011	14.7212	9.37994	Average	23.7365	14.7545	8.98204	-0.397895	1.32261
Median	24.0161	14.7192	9.29286	Median	23.7073	14.7668	8.96516	-0.41478	1.33312
SD	0.364314	0.0308735	0.387084	SD	0.196252	0.0702375	0.146264	0.146264	0.131746
	P value								0.0658728
Ksr1	0.128466
PPIA	0.419483
Ct	0.102816
Relative Fold	0.0633185
Fold Incr	1.31758
