# Supplementary material for: Contrasting effects of Ksr2, an obesity gene, on trabecular bone volume and bone marrow adiposity
Source: eLife. 2022 Nov 7;11:e82810. doi: 10.7554/eLife.82810 (PMC9640193; doi:10.7554/eLife.82810)
Supplement: Figure 6—source data 2. — Average fold changes plotted and t-test values are highlighted in yellow. Source data for Figure 6C. [file elife-82810-fig6-data2.xlsx]

## Sheet: Ksr2
Source Data for Figure 6C
							PPIA	2019-06-12
Grown in 10%FBS MCSF and MCSF + 30ng/mL Rank Ligand							Ksr2	2019-06-12
RNA Extractions done by Jasmine Lau
Nano, dilutions and RT done by JL
1d MCSF	Ksr2	PPIA	∆Ct	1d MCSF+Rank	Ksr2	PPIA	∆Ct	∆∆Ct
1	23.36	14.653	8.70696	1	22.5468	14.5174	8.02933	-0.557265	1.47148
2	23.3679	14.6382	8.72969	2	23.1799	14.455	8.72493	0.138333	0.908568
3	22.8003	14.6557	8.14464	3	23.8289	14.455	9.37399	0.787392	0.579391
4	23.3534	14.5883	8.76509	4	24.1492	14.3963	9.75292	1.16632	0.445555
Average	23.2204	14.847	8.5866	Average	23.4262	14.4559	8.97029	0.383696	0.851248
Median	23.3567	14.8312	8.71833	Median	23.5044	14.455	9.04946	0.462862	0.743979
SD	0.280129	0.0710592	0.295609	SD	0.711584	0.0494518	0.757427	0.757427	0.456969
	P value								0.228485
Ksr2	0.609749
PPIA	0.000900145								PPIA	Ksr2
Ct	0.381697							Blank	30.6752	31.0934
Relative Fold	1.30216							Blank	30.6631	31.7145
Fold Incr	0.766471
4dMCSF	Ksr2	PPIA	∆Ct	4dMCSF+Rank	Ksr2	PPIA	∆Ct	∆∆Ct
1	25.3724	14.5643	10.8081	1	25.3122	14.6283	10.6839	0.168564	0.889728
2	24.8733	14.602	10.2713	2	25.1671	14.4551	10.712	0.196667	0.872564
3	24.9479	14.6329	10.315	3	25.2363	14.5215	10.7148	0.19947	0.870871
4	25.3085	14.6415	10.667	4	24.8348	14.4227	10.412	-0.103333	1.07425
Average	25.1255	14.847	10.5154	Average	25.1376	14.5069	10.6307	0.115342	0.926854
Median	25.1282	14.8312	10.491	Median	25.2017	14.4883	10.698	0.182615	0.881146
SD	0.251398	0.0710592	0.263579	SD	0.210404	0.090757	0.146449	0.146449	0.0986341
	P value								0.049317
Ksr2	0.943677
PPIA	0.077898
Ct	0.473255
Relative Fold	0.0685347
Fold Incr	0.923164
6d MCSF	Ksr2	PPIA	∆Ct	6d MCSF+Rank	Ksr2	PPIA	∆Ct	∆∆Ct
1	24.7729	14.6643	10.1085	1	24.2096	14.7655	9.44409	-0.836924	1.78624
2	24.6979	14.6678	10.0301	2	23.6703	14.6167	9.05361	-1.2274	2.34145
3	25.1969	14.7002	10.4968	3	23.7558	14.7728	8.98291	-1.2981	2.45905
4	25.23	14.7413	10.4887	4	24.4547	14.6965	9.75821	-0.522803	1.43674
Average	24.9744	14.847	10.281	Average	24.0226	14.7129	9.30971	-0.971308	2.00587
Median	24.9849	14.8312	10.2986	Median	23.9827	14.731	9.24885	-1.03216	2.06384
SD	0.278058	0.0710592	0.246569	SD	0.372803	0.0727558	0.361291	0.361291	0.479628
	P value								0.239814
Ksr2	0.00640575
PPIA	0.648155
Ct	0.00437033
Relative Fold	0.37212
Fold Incr	1.96062

## Sheet: Acp5
Source Data for Figure 6C
							PPIA	2019-06-12
Grown in 10%FBS MCSF and MCSF + 30ng/mL Rank Ligand							Acp5	2019-06-12
RNA Extractions done by Jasmine Lau
Nano, dilutions and RT done by JL
1d MCSF	Acp5	PPIA	∆Ct	1d MCSF+Rank	Acp5	PPIA	∆Ct	∆∆Ct
1	17.3424	14.653	2.68937	1	16.6636	14.5174	2.14614	-0.407889	1.32674
2	17.2619	14.6382	2.6237	2	16.5148	14.455	2.05982	-0.494205	1.40854
3	17.1628	14.6557	2.50716	3	16.3249	14.455	1.86991	-0.68412	1.60672
4	16.9842	14.5883	2.39589	4	16.1242	14.3963	1.72792	-0.826113	1.7729
Average	17.1878	14.847	2.55403	Average	16.4069	14.4559	1.95095	-0.603082	1.52873
Median	17.2123	14.8312	2.56543	Median	16.4199	14.455	1.96487	-0.589162	1.50763
SD	0.154344	0.0710592	0.129583	SD	0.23392	0.0494518	0.188206	0.188206	0.200787
	P value								0.100393
KSR2 (Lewis)	0.00141536
PPIA	0.000900145								PPIA	Acp5
Ct	0.00186779							Blank	30.6752	31.1755
Relative Fold	0.172122							Blank	30.6631	Undetermined
Fold Incr	1.51896
4dMCSF	Acp5	PPIA	∆Ct	4dMCSF+Rank	Acp5	PPIA	∆Ct	∆∆Ct
1	20.7183	14.5643	6.15401	1	14.3889	14.6283	-0.239349	-6.48594	89.6322
2	21.2475	14.602	6.64552	2	14.3511	14.4551	-0.103999	-6.35059	81.6055
3	20.8648	14.6329	6.23189	3	14.4229	14.5215	-0.0985479	-6.34514	81.2977
4	20.5964	14.6415	5.95496	4	14.3392	14.4227	-0.0835466	-6.33014	80.4568
Average	20.8568	14.847	6.2466	Average	14.3755	14.5069	-0.131361	-6.37796	83.248
Median	20.7915	14.8312	6.19295	Median	14.37	14.4883	-0.101274	-6.34787	81.4516
SD	0.282668	0.0710592	0.290387	SD	0.0380495	0.090757	0.0725099	0.0725099	4.28369
	P value								2.14184
KSR2 (Lewis)	7.60209e-09
PPIA	0.077898
Ct	1.11672e-08
Relative Fold	39.7587
Fold Incr	83.168
6d MCSF	Acp5	PPIA	∆Ct	6d MCSF+Rank	Acp5	PPIA	∆Ct	∆∆Ct
1	21.4726	14.6643	6.80826	1	14.2195	14.7655	-0.546024	-7.56365	189.185
2	21.8327	14.6678	7.16488	2	14.0798	14.6167	-0.53687	-7.5545	187.988
3	21.437	14.7002	6.73682	3	14.1756	14.7728	-0.597215	-7.61485	196.018
4	22.1019	14.7413	7.36056	4	14.1755	14.6965	-0.520948	-7.53858	185.925
Average	21.711	14.847	7.01763	Average	14.1626	14.7129	-0.550264	-7.56789	189.779
Median	21.6526	14.8312	6.98657	Median	14.1756	14.731	-0.541447	-7.55908	188.587
SD	0.315958	0.0710592	0.295504	SD	0.0589289	0.0727558	0.0329704	0.0329704	4.37188
	P value								2.18594
KSR2 (Lewis)	6.24045e-09
PPIA	0.648155
Ct	3.85596e-09
Relative Fold	56.7751
Fold Incr	189.742
