# Supplementary material for: Contrasting effects of Ksr2, an obesity gene, on trabecular bone volume and bone marrow adiposity
Source: eLife. 2022 Nov 7;11:e82810. doi: 10.7554/eLife.82810 (PMC9640193; doi:10.7554/eLife.82810)
Supplement: Figure 6—source data 3. — Average fold changes plotted and t-test values are highlighted in yellow. Source data for Figure 6E. [file elife-82810-fig6-data3.xlsx]

## Sheet: Nano
2019 #26
Group	ID	[nano ng]	[avg ng]	ul RNA	ul H2O	ul H2O after RT	# RXN
BMSC GFP Control	1	32.6	32.45	9.24499	0.755008	80	20
		32.3
	2	25.3	25.65	10	0	65.5	17.1
		26
	3	25.4	25.7	10	0	65.6667	17.1333
		26
	4	20.1	19.8	10	0	46	13.2
		19.5
BMSC KSR2-OE Control	1	37.2	37.1	8.08625	1.91375	80	20
		37
	2	26.1	26.4	10	0	68	17.6
		26.7
	3	25.1	25.85	10	0	66.1667	17.2333
		26.6
	4	38	37.5	8	2	80	20
		37
BMSC GFP BAA	1	28.5	28.75	10	0	75.8333	19.1667
		29
	2	28.8	28.75	10	0	75.8333	19.1667
		28.7
	3	39	39.2	7.65306	2.34694	80	20
		39.4
	4	24.6	24.7	10	0	62.3333	16.4667
		24.8
BMSC KSR2-OE BAA	1	26.9	27.6	10	0	72	18.4
		28.3
	2	62.3	62.95	4.76569	5.23431	80	20
		63.6
	3	34.5	34.65	8.65801	1.34199	80	20
		34.8
	4	23.5	23.55	10	0	58.5	15.7
		23.6
BMSC GFP Insulin	1	56.9	56.95	5.26778	4.73222	80	20
		57
	2	25.3	24.45	10	0	61.5	16.3
		23.6
	3	26.7	26.8	10	0	69.3333	17.8667
		26.9
	4	23.7	23.9	10	0	59.6667	15.9333
		24.1
BMSC KSR2-OE Insulin	1	31.3	30.45	9.85222	0.147783	80	20
		29.6
	2	37.2	37.2	8.06452	1.93548	80	20
		37.2
	3	30.6	29.6	10	0	78.6667	19.7333
		28.6
	4	39.4	39	7.69231	2.30769	80	20
		38.6

## Sheet: KSR2
2019 #26 3d BMSC extracted							PPIA	2019-03-21
8wk tiCre Tom Homo mice hit with 3mL of LV-GFP and LV-KSR2OE for 24 hrs							KSR2 (Lewis)	2019-03-21
1% reduced serum
RNA Extractions done by Jasmine Lau
Nano, dilutions and RT done by JL
BMM GFP	KSR2(Lewis)	PPIA	∆Ct	BMM KSR2OE	KSR2(Lewis)	PPIA	∆Ct	∆∆Ct
1	31.3386	14.9432	16.3954	1	20.258	14.9192	5.33886	-10.1001	1097.54
2	29.8789	15.0763	14.8026	2	21.5529	15.2821	6.27079	-9.16812	575.278
3	30.3241	14.9847	15.3393	3	20.825	14.9377	5.8873	-9.55161	750.451
4	30.383	15.1647	15.2183	4	21.4932	15.2027	6.29048	-9.14843	567.482
Average	30.4811	14.847	15.4389	Average	21.0323	15.0854	5.94686	-9.49205	747.687
Median	30.3535	14.8312	15.2788	Median	21.1591	15.0702	6.07905	-9.35986	662.865
SD	0.614345	0.0710592	0.677819	SD	0.612606	0.184281	0.445804	0.445804	248.06
	P value								124.03
KSR2 (Lewis)	6.11498e-07
PPIA	0.693837							PPIA	KSR2(Lewis)
Ct	3.9955e-07						Blank	Undetermined	Undetermined
Relative Fold	81.8346						Blank	Undetermined	Undetermined
Fold Incr	720.1

## Sheet: KSR2 (2)
2019 #26 3d BMSC extracted							PPIA	2019-06-13
8wk tiCre Tom Homo mice hit with 3mL of LV-GFP and LV-KSR2OE for 24 hrs							KSR2(2)	2019-06-13
1% reduced serum
RNA Extractions done by Jasmine Lau
Nano, dilutions and RT done by JL
BMSC GFP	KSR2(2)	PPIA	∆Ct	BMSC GFP	KSR2(2)	PPIA	∆Ct	∆∆Ct
Cntrl 1	27.8981	14.6802	13.2179	BAA 1	26.9933	14.7861	12.2072	-1.25263	2.38275
Cntrl 2	28.4215	14.6979	13.7236	BAA 2	27.4128	14.8323	12.5805	-0.879343	1.83954
Cntrl 3	28.606	14.75	13.856	BAA 3	27.7301	14.9302	12.7999	-0.659932	1.58001
Cntrl 4	27.7112	14.6696	13.0417	BAA 4	27.1957	14.8064	12.3894	-1.07045	2.10008
Average	28.1592	14.847	13.4598	Average	27.333	14.8388	12.4942	-0.965588	1.9756
Median	28.1598	14.8312	13.4708	Median	27.3043	14.8194	12.4849	-0.974895	1.96981
SD	0.42319	0.0710592	0.391556	SD	0.315319	0.0638284	0.254462	0.254462	0.344614
	P value								0.172307
KSR2(2)	0.020294
PPIA	0.00884829							PPIA	KSR2(2)
Ct	0.00610935						Blank	33.5132	Undetermined
Relative Fold	0.505701						Blank	31.6102	Undetermined
Fold Incr	1.95286
BMSC GFP	KSR2(2)	PPIA	∆Ct	BMSC GFP	KSR2(2)	PPIA	∆Ct	∆∆Ct
Cntrl 1	27.8981	14.6802	13.2179	Inuslin 1	28.5822	15.2507	13.3315	-0.128275	1.09299
Cntrl 2	28.4215	14.6979	13.7236	Insulin 2	28.6628	14.8948	13.7681	0.30826	0.807615
Cntrl 3	28.606	14.75	13.856	Insulin 3	29.1999	14.7951	14.4048	0.944978	0.519437
Cntrl 4	27.7112	14.6696	13.0417	Insulin 4	28.3871	14.7652	13.6219	0.162113	0.893715
Average	28.1592	14.847	13.4598	Average	28.708	14.9264	13.7816	0.321769	0.828439
Median	28.1598	14.8312	13.4708	Median	28.6225	14.8449	13.695	0.235186	0.850665
SD	0.42319	0.0710592	0.391556	SD	0.347754	0.223133	0.453359	0.453359	0.238161
	P value								0.11908
KSR2(2)	0.091932
PPIA	0.0912256
Ct	0.323989
Relative Fold	0.600823
Fold Incr	0.800088
BMSC GFP	KSR2(2)	PPIA	∆Ct	BMSC KSR2OE	KSR2(2)	PPIA	∆Ct	∆∆Ct
Cntrl 1	27.8981	14.6802	13.2179	Cntrl 1	18.4621	14.742	3.72004	-9.73976	854.99
Cntrl 2	28.4215	14.6979	13.7236	Cntrl 2	19.5944	14.9256	4.6688	-8.791	442.95
Cntrl 3	28.606	14.75	13.856	Cntrl 3	18.9521	14.7535	4.19869	-9.26111	613.582
Cntrl 4	27.7112	14.6696	13.0417	Cntrl 4	19.5737	14.9704	4.60334	-8.85647	463.514
Average	28.1592	14.847	13.4598	Average	19.1456	14.8479	4.29772	-9.16209	593.759
Median	28.1598	14.8312	13.4708	Median	19.2629	14.8395	4.40101	-9.05879	538.548
SD	0.42319	0.0710592	0.391556	SD	0.544479	0.11715	0.437655	0.437655	190.037
	P value								95.0183
KSR2(2)	2.06701e-07
PPIA	0.0515295
Ct	7.19571e-08
Relative Fold	76.1157
Fold Incr	572.879
BMSC GFP	KSR2(2)	PPIA	∆Ct	BMSC KSR2OE	KSR2(2)	PPIA	∆Ct	∆∆Ct
Cntrl 1	27.8981	14.6802	13.2179	BAA 1	19.6153	14.6551	4.96014	-8.49967	361.955
Cntrl 2	28.4215	14.6979	13.7236	BAA 2	20.2963	14.9953	5.30097	-8.15883	285.795
Cntrl 3	28.606	14.75	13.856	BAA 3	19.6136	14.6476	4.96594	-8.49386	360.501
Cntrl 4	27.7112	14.6696	13.0417	BAA 4	20.216	14.7406	5.47548	-7.98432	253.234
Average	28.1592	14.847	13.4598	Average	19.9353	14.7597	5.17563	-8.28417	315.371
Median	28.1598	14.8312	13.4708	Median	19.9156	14.6978	5.13346	-8.32635	323.148
SD	0.42319	0.0710592	0.391556	SD	0.371972	0.162679	0.25562	0.25562	54.5974
	P value								27.2987
KSR2(2)	1.07075e-07
PPIA	0.496558
Ct	3.36891e-08
Relative Fold	64.4576
Fold Incr	311.734
BMSC GFP	KSR2(2)	PPIA	∆Ct	BMSC KSR2OE	KSR2(2)	PPIA	∆Ct	∆∆Ct
Cntrl 1	27.8981	14.6802	13.2179	Inuslin 1	19.3431	14.7147	4.62831	-8.83149	455.559
Cntrl 2	28.4215	14.6979	13.7236	Insulin 2	20.4352	15.5124	4.92278	-8.53702	371.45
Cntrl 3	28.606	14.75	13.856	Insulin 3	19.3313	14.771	4.5603	-8.8995	477.547
Cntrl 4	27.7112	14.6696	13.0417	Insulin 4	19.3362	14.7088	4.62741	-8.83239	455.842
Average	28.1592	14.847	13.4598	Average	19.6114	14.9267	4.6847	-8.7751	440.1
Median	28.1598	14.8312	13.4708	Median	19.3396	14.7429	4.62786	-8.83194	455.701
SD	0.42319	0.0710592	0.391556	SD	0.549186	0.391451	0.161883	0.161883	46.911
	P value								23.4555
KSR2(2)	2.927e-07
PPIA	0.291349
Ct	1.3243e-08
Relative Fold	74.1876
Fold Incr	438.096
BMSC KSR2OE	KSR2(2)	PPIA	∆Ct	BMSC KSR2OE	KSR2(2)	PPIA	∆Ct	∆∆Ct
Cntrl 1	18.4621	14.742	3.72004	BAA 1	19.6153	14.6551	4.96014	0.662418	0.631818
Cntrl 2	19.5944	14.9256	4.6688	BAA 2	20.2963	14.9953	5.30097	1.00325	0.498875
Cntrl 3	18.9521	14.7535	4.19869	BAA 3	19.6136	14.6476	4.96594	0.668226	0.62928
Cntrl 4	19.5737	14.9704	4.60334	BAA 4	20.216	14.7406	5.47548	1.17776	0.442037
Average	19.1456	14.847	4.29772	Average	19.9353	14.7597	5.17563	0.877914	0.550502
Median	19.2629	14.8312	4.40101	Median	19.9156	14.6978	5.13346	0.835739	0.564077
SD	0.544479	0.0710592	0.437655	SD	0.371972	0.162679	0.25562	0.25562	0.0953037
	P value								0.0476518
KSR2(2)	0.0536468
PPIA	0.41267
Ct	0.0133969
Relative Fold	1.2849
Fold Incr	0.544154
BMSC KSR2OE	KSR2(2)	PPIA	∆Ct	BMSC KSR2OE	KSR2(2)	PPIA	∆Ct	∆∆Ct
Cntrl 1	18.4621	14.742	3.72004	Inuslin 1	19.3431	14.7147	4.62831	0.330591	0.795211
Cntrl 2	19.5944	14.9256	4.6688	Insulin 2	20.4352	15.5124	4.92278	0.625061	0.648392
Cntrl 3	18.9521	14.7535	4.19869	Insulin 3	19.3313	14.771	4.5603	0.262586	0.833593
Cntrl 4	19.5737	14.9704	4.60334	Insulin 4	19.3362	14.7088	4.62741	0.329695	0.795705
Average	19.1456	14.847	4.29772	Average	19.6114	14.9267	4.6847	0.386983	0.768225
Median	19.2629	14.8312	4.40101	Median	19.3396	14.7429	4.62786	0.330143	0.795458
SD	0.544479	0.0710592	0.437655	SD	0.549186	0.391451	0.161883	0.161883	0.0818864
	P value								0.0409432
KSR2(2)	0.273649
PPIA	0.712774
Ct	0.148266
Relative Fold	0.301254
Fold Incr	0.764727
BMSC GFP	KSR2(2)	PPIA	∆Ct	BMSC KSR2OE	KSR2(2)	PPIA	∆Ct	∆∆Ct
Inuslin 1	28.5822	15.2507	13.3315	Inuslin 1	19.3431	14.7147	4.62831	-9.15326	569.386
Insulin 2	28.6628	14.8948	13.7681	Insulin 2	20.4352	15.5124	4.92278	-8.85879	464.261
Insulin 3	29.1999	14.7951	14.4048	Insulin 3	19.3313	14.771	4.5603	-9.22127	596.868
Insulin 4	28.3871	14.7652	13.6219	Insulin 4	19.3362	14.7088	4.62741	-9.15416	569.74
Average	28.708	14.847	13.7816	Average	19.6114	14.9267	4.6847	-9.09687	550.064
Median	28.6225	14.8312	13.695	Median	19.3396	14.7429	4.62786	-9.15371	569.563
SD	0.347754	0.0710592	0.453359	SD	0.549186	0.391451	0.161883	0.161883	58.6322
	P value								29.3161
KSR2(2)	1.37644e-07
PPIA	0.998954
Ct	2.29085e-08
Relative Fold	79.834
Fold Incr	547.559
BMSC GFP	KSR2(2)	PPIA	∆Ct	BMSC KSR2OE	KSR2(2)	PPIA	∆Ct	∆∆Ct
BAA 1	26.9933	14.7861	12.2072	BAA 1	19.6153	14.6551	4.96014	-7.53408	185.346
BAA 2	27.4128	14.8323	12.5805	BAA 2	20.2963	14.9953	5.30097	-7.19325	146.347
BAA 3	27.7301	14.9302	12.7999	BAA 3	19.6136	14.6476	4.96594	-7.52827	184.602
BAA 4	27.1957	14.8064	12.3894	BAA 4	20.216	14.7406	5.47548	-7.01874	129.673
Average	27.333	14.847	12.4942	Average	19.9353	14.7597	5.17563	-7.31858	161.492
Median	27.3043	14.8312	12.4849	Median	19.9156	14.6978	5.13346	-7.36076	165.474
SD	0.315319	0.0710592	0.254462	SD	0.371972	0.162679	0.25562	0.25562	27.9577
	P value								13.9788
KSR2(2)	8.50586e-08
PPIA	0.400211
Ct	1.49683e-08
Relative Fold	49.8854
Fold Incr	159.629

## Sheet: Alpl
Source Data for Figure 6E
							PPIA	2019-06-13
RNA Extractions done by Jasmine Lau							Alpl	2019-06-13
Nano, dilutions and RT done by JL
BMSC GFP	Alpl	PPIA	∆Ct	BMSC GFP	Alpl	PPIA	∆Ct	∆∆Ct			This is GFP in AA
Cntrl 1	18.5895	14.6802	3.90929	BAA 1	18.496	14.7861	3.70992	-0.303534	1.23416
Cntrl 2	18.8202	14.6979	4.12237	BAA 2
Cntrl 3	18.9014	14.75	4.15147	BAA 3	18.596	14.9302	3.66577	-0.347683	1.27252
Cntrl 4	18.5403	14.6696	3.8707	BAA 4	17.8862	14.8064	3.07976	-0.933697	1.91016
Average	18.7129	14.847	4.01346	Average	18.326	14.8409	3.48515	-0.528304	1.47228
Median	18.7049	14.8312	4.01583	Median	18.496	14.8064	3.66577	-0.347683	1.27252
SD	0.175216	0.0710592	0.143922	SD	0.384226	0.0779973	0.351773	0.351773	0.379702
	P value								0.189851
Alpl	0.128482
PPIA	0.0220416							PPIA	Alpl
Ct	0.0389182						Blank	33.5132	34.8764
Relative Fold	0.0311633						Blank	31.6102	34.5484
Fold Incr	1.44223
BMSC GFP	Alpl	PPIA	∆Ct	BMSC KSR2OE	Alpl	PPIA	∆Ct	∆∆Ct			This is Ksr2 vehicle
Cntrl 1	18.5895	14.6802	3.90929	Cntrl 1
Cntrl 2	18.8202	14.6979	4.12237	Cntrl 2	19.7352	14.9256	4.80958	0.796124	0.575894
Cntrl 3	18.9014	14.75	4.15147	Cntrl 3	19.4103	14.7535	4.65689	0.643433	0.640188
Cntrl 4	18.5403	14.6696	3.8707	Cntrl 4	19.6501	14.9704	4.67973	0.666276	0.630131
Average	18.7129	14.847	4.01346	Average	19.5986	14.8832	4.7154	0.701944	0.615404
Median	18.7049	14.8312	4.01583	Median	19.6501	14.9256	4.67973	0.666276	0.630131
SD	0.175216	0.0710592	0.143922	SD	0.16846	0.114533	0.0823577	0.0823577	0.0345842
	P value								0.0172921
Alpl	0.00110492
PPIA	0.0267582
Ct	0.000679196
Relative Fold	0.61513
Fold Incr	0.614743
BMSC GFP	Alpl	PPIA	∆Ct	BMSC KSR2OE	Alpl	PPIA	∆Ct	∆∆Ct			This is Ksr2 in AA
Cntrl 1	18.5895	14.6802	3.90929	BAA 1	18.9225	14.6551	4.2674	0.253939	0.838604
Cntrl 2	18.8202	14.6979	4.12237	BAA 2	19.7137	14.9953	4.71838	0.704919	0.613477
Cntrl 3	18.9014	14.75	4.15147	BAA 3	18.7207	14.6476	4.07314	0.059685	0.959474
Cntrl 4	18.5403	14.6696	3.8707	BAA 4	18.5678	14.7406	3.82727	-0.186189	1.13775
Average	18.7129	14.847	4.01346	Average	18.9812	14.7597	4.22154	0.208088	0.887327
Median	18.7049	14.8312	4.01583	Median	18.8216	14.6978	4.17027	0.156812	0.899039
SD	0.175216	0.0710592	0.143922	SD	0.509488	0.162679	0.377015	0.377015	0.220066
	P value								0.110033
Alpl	0.357653
PPIA	0.496558
Ct	0.342174
Relative Fold	0.342346
Fold Incr	0.865684
