# Supplementary material for: Contrasting effects of Ksr2, an obesity gene, on trabecular bone volume and bone marrow adiposity
Source: eLife. 2022 Nov 7;11:e82810. doi: 10.7554/eLife.82810 (PMC9640193; doi:10.7554/eLife.82810)
Supplement: Figure 6—source data 4. — Average fold changes plotted and t-test values are highlighted in yellow. Source data for Figure 6F. [file elife-82810-fig6-data4.xlsx]

## Sheet: Ccnd1
Source Data for Figure 6F
									2019-05-10	PPIA	SP
No Serum Free, 7d treatment									2019-05-10	Ccnd1	SP
Extraction for experiment by SP
Nano and RT for controls by JL
GFP	Ccnd1	PPIA	∆Ct	KSR2 OE	Ccnd1	PPIA	∆Ct	∆∆Ct
Cntrl 1	20.3961	14.6856	5.7105	Cntrl 1	20.3903	14.6554	5.7349	0.0263329	0.981913
Cntrl 2	20.4061	14.6984	5.70774	Cntrl 2	20.2929	14.6324	5.6605	-0.0480709	1.03388
Cntrl 3	20.6963	14.7044	5.99188	Cntrl 3	20.2701	14.6942	5.57592	-0.132646	1.0963
Cntrl 4	20.1765	14.7524	5.42415	Cntrl 4	20.5371	14.698	5.83915	0.130583	0.913462
Average	20.4187	14.7102	5.70857	Average	20.3726	14.67	5.70262	-0.00595021	1.00639
Median	20.4011	14.7014	5.70912	Median	20.3416	14.6748	5.6977	-0.010869	1.0079
SD	0.213193	0.0291995	0.231778	SD	0.121436	0.0315916	0.111817	0.111817	0.0776202
	P value								0.0388101
Ccnd1	0.719836						blank	blank
PPIA	0.110992					PPIA 5/10/19	24.8379	24.7765
Ct	0.964617					Ccnd1 5/10	Undetermined	Undetermined
Relative Fold	0.0112078	0.0138692
Fold Incr	1.00413

## Sheet: Alpl
Source Data for Figure 6F
									2019-05-10	PPIA	SP
No Serum Free, 7d treatment									2019-05-10	Alpl	SP
Extraction for experiment by SP
Nano and RT for controls by JL
GFP	Alpl	PPIA	∆Ct	KSR2 OE	Alpl	PPIA	∆Ct	∆∆Ct
Cntrl 1	17.7945	14.6856	3.10887	Cntrl 1	18.0282	14.6554	3.37274	0.246658	0.842846
Cntrl 2	17.784	14.6984	3.0856	Cntrl 2	17.8598	14.6324	3.22737	0.10129	0.932199
Cntrl 3	17.9016	14.7044	3.19719	Cntrl 3	18.1119	14.6942	3.4177	0.291615	0.816987
Cntrl 4	17.865	14.7524	3.11267	Cntrl 4	18.1615	14.698	3.46349	0.337406	0.791463
Average	17.8363	14.7102	3.12608	Average	18.0403	14.67	3.37032	0.244242	0.845874
Median	17.8298	14.7014	3.11077	Median	18.07	14.6748	3.39522	0.269137	0.829917
SD	0.056488	0.0291995	0.0488917	SD	0.132342	0.0315916	0.10225	0.10225	0.0612542
	P value								0.0306271
Alpl	0.0297101						blank	blank
PPIA	0.110992					PPIA 5/10/19	24.8379	24.7765
Ct	0.00503741					Alpl 5/10	37.1095	Undetermined
Relative Fold	0.120057
Fold Incr	0.844259

## Sheet: Ibsp
Source Data for Figure 6F
									2019-05-10	PPIA	SP
No Serum Free, 7d treatment									2019-05-25	Ibsp	JL
Extraction for experiment by SP									threshold 0.04
Nano and RT for controls by JL
GFP	Ibsp	PPIA	∆Ct	KSR2 OE	Ibsp	PPIA	∆Ct	∆∆Ct
Cntrl 1	18.6975	14.6856	4.01188	Cntrl 1	19.1897	14.6554	4.53432	0.394059	0.760986
Cntrl 2	18.9183	14.6984	4.21989	Cntrl 2	18.8117	14.6324	4.17928	0.039021	0.973315
Cntrl 3	19.0023	14.7044	4.2979	Cntrl 3	19.3602	14.6942	4.66597	0.525712	0.694616
Cntrl 4	18.7837	14.7524	4.03136	Cntrl 4	19.0944	14.698	4.39637	0.256115	0.837339
Average	18.8504	14.7102	4.14026	Average	19.114	14.67	4.44398	0.303727	0.816564
Median	18.851	14.7014	4.12562	Median	19.142	14.6748	4.46534	0.325087	0.799163
SD	0.136017	0.0291995	0.140867	SD	0.229574	0.0315916	0.207985	0.207985	0.11967
	P value								0.0598351
Ibsp	0.0956438
PPIA	0.110992						PPIA	Ibsp
Ct	0.0519898					Blank		36.5748
Relative Fold	0.261849					Blank		33.2622
Fold Incr	0.810157

## Sheet: Spp1
Source Data for Figure 6F
									2019-05-10	PPIA	SP
No Serum Free, 7d treatment									2019-05-14	Spp1	SP
Extraction for experiment by SP									threshold 0.04
Nano and RT for controls by JL
GFP	Spp1	PPIA	∆Ct	KSR2 OE	Spp1	PPIA	∆Ct	∆∆Ct
Cntrl 1	14.9696	14.6856	0.283998	Cntrl 1	15.1114	14.6554	0.45595	0.17952	0.882997
Cntrl 2	15.0337	14.6984	0.335316	Cntrl 2	15.1195	14.6324	0.487087	0.210658	0.864143
Cntrl 3	14.9703	14.7044	0.265944	Cntrl 3	15.2096	14.6942	0.515435	0.239006	0.847329
Cntrl 4	14.9728	14.7524	0.220461	Cntrl 4	15.1834	14.698	0.485418	0.208989	0.865143
Average	14.9866	14.7102	0.276429	Average	15.156	14.67	0.485973	0.209543	0.864903
Median	14.9716	14.7014	0.274971	Median	15.1514	14.6748	0.486253	0.209823	0.864643
SD	0.0314227	0.0291995	0.0474949	SD	0.0481355	0.0315916	0.0242965	0.0242965	0.01457
	P value								0.007285
Spp1	0.00106022
PPIA	0.110992						PPIA	Spp1
Ct	0.000225073					Blank		Undetermined
Relative Fold	0.054681					Blank		Undetermined
Fold Incr	0.864811

## Sheet: Runx2
Source Data for Figure 6F
									2019-05-10	PPIA	SP
No Serum Free, 7d treatment									2019-05-21	RUNX2	JL
Extraction for experiment by SP									threshold 0.04
Nano and RT for controls by JL
GFP	RUNX2	PPIA	∆Ct	KSR2 OE	RUNX2	PPIA	∆Ct	∆∆Ct
Cntrl 1	20.2422	14.6856	5.55657	Cntrl 1	20.8633	14.6554	6.20791	0.50637	0.703991
Cntrl 2	20.6362	14.6984	5.93782	Cntrl 2	20.6199	14.6324	5.98749	0.285953	0.8202
Cntrl 3	20.3146	14.7044	5.61023	Cntrl 3	20.6096	14.6942	5.91541	0.213872	0.86222
Cntrl 4				Cntrl 4	20.7245	14.698	6.02651	0.324972	0.798314
Average	20.3977	14.6961	5.70154	Average	20.7043	14.67	6.03433	0.332792	0.796181
Median	20.3146	14.6984	5.61023	Median	20.6722	14.6748	6.007	0.305463	0.809257
SD	0.209738	0.00959326	0.206376	SD	0.118025	0.0315916	0.124534	0.124534	0.0669366
	P value								0.0334683
RUNX2	0.0549981			Insulin 4	23.6983	14.7524
PPIA	0.233067							PPIA	RUNX2
Ct	0.0435754						Blank		31.5407
Relative Fold	0.209147						Blank		33.6163
Fold Incr	0.793999

## Sheet: Sp7
Source Data for Figure 6F
									2019-05-10	PPIA	SP
No Serum Free, 7d treatment									2019-05-21	Sp7	JL
Extraction for experiment by SP									threshold 0.04
Nano and RT for controls by JL
GFP	Sp7	PPIA	∆Ct	KSR2 OE	Sp7	PPIA	∆Ct	∆∆Ct
Cntrl 1	22.7122	14.6856	8.02661	Cntrl 1	23.1437	14.6554	8.48829	0.228171	0.853716
Cntrl 2	22.9289	14.6984	8.23048	Cntrl 2	23.1215	14.6324	8.48913	0.229016	0.853216
Cntrl 3	22.9832	14.7044	8.27888	Cntrl 3	23.932	14.6942	9.23781	0.977692	0.507792
Cntrl 4	23.2569	14.7524	8.5045	Cntrl 4	23.3155	14.698	8.61753	0.357417	0.780561
Average	22.9703	14.7102	8.26012	Average	23.3782	14.67	8.70819	0.448074	0.748821
Median	22.9561	14.7014	8.25468	Median	23.2296	14.6748	8.55333	0.293217	0.816889
SD	0.22407	0.0291995	0.196195	SD	0.379247	0.0315916	0.358263	0.358263	0.164321
	P value								0.0821604
Sp7	0.113477
PPIA	0.110992						PPIA	Sp7
Ct	0.0706905					Blank		Undetermined
Relative Fold	0.650179					Blank		Undetermined
Fold Incr	0.733021
