# Supplementary material for: Contrasting effects of Ksr2, an obesity gene, on trabecular bone volume and bone marrow adiposity
Source: eLife. 2022 Nov 7;11:e82810. doi: 10.7554/eLife.82810 (PMC9640193; doi:10.7554/eLife.82810)
Supplement: Figure 6—source data 5. — Source data for Figure 6H. [file elife-82810-fig6-data5.xlsx]

## Sheet: Osteoclast differentiation
Source Data for Figure 6H
All multinuclear cells counted
	GFP
	Well 1	Well 2	Well 3	Well 4	Total of all wells	Average of all wells
Large	28	18	17	12	75	18.75
Small	44	36	68	52	200	50
Large + Small	72	54	85	64	275	68.75
	KSR2OE
					Total of all wells	Average of all wells
Large	8	23	14	14	59	14.75
Small	56	56	85	54	251	62.75
Large + Small	64	79	99	68	310	77.5
