# Supplementary material for: Contrasting effects of Ksr2, an obesity gene, on trabecular bone volume and bone marrow adiposity
Source: eLife. 2022 Nov 7;11:e82810. doi: 10.7554/eLife.82810 (PMC9640193; doi:10.7554/eLife.82810)
Supplement: Figure 6—source data 6. — Average fold changes plotted and t-test values are highlighted in yellow. Source data for Figure 6I. [file elife-82810-fig6-data6.xlsx]

## Sheet: Ksr2
Source Data for Figure 6I
							PPIA	2019-04-24	JL
							Ksr2	2019-04-25	SP
RNA Extractions done by Jasmine Lau
Nano, dilutions and RT done by JL
BMM GFP	Ksr2	PPIA	∆Ct	BMM KSR2OE	Ksr2	PPIA	∆Ct	∆∆Ct
1	30.9134	14.4492	16.4642	1	23.7988	14.3965	9.40222	-7.23128	150.256
2	31.7902	14.3859	17.4043	2	23.9539	14.4836	9.47026	-7.16323	143.334
3	30.6687	14.4378	16.2309	3	24.2884	14.4195	9.86887	-6.76463	108.731
4	30.8801	14.4456	16.4345	4	23.1734	14.4163	8.75713	-7.87637	234.976
Average	31.0631	14.847	16.6335	Average	23.8036	14.429	9.37462	-7.25888	159.324
Median	30.8968	14.8312	16.4494	Median	23.8763	14.4179	9.43624	-7.19725	146.795
SD	0.496688	0.0710592	0.524218	SD	0.467178	0.0377917	0.460249	0.460249	53.6056
	P value								26.8028
KSR2 (Lewis)	6.9971e-07
PPIA	0.979681							PPIA	KSR2(Lewis)
Ct	8.01358e-07						Blank	25.361	Undetermined
Relative Fold	46.2213						Blank	24.585	Undetermined
Fold Incr	153.158

## Sheet: Acp5
Source Data for Figure 6I
							PPIA	2019-04-24
							Acp5	2019-04-24
RNA Extractions done by Jasmine Lau
Nano, dilutions and RT done by JL
BMM GFP	Acp5	PPIA	∆Ct	BMM KSR2OE	Acp5	PPIA	∆Ct	∆∆Ct
1	14.1349	14.4492	-0.314304	1	14.133	14.3965	-0.263592	0.0270355	0.981435
2	14.1257	14.3859	-0.26025	2	14.0738	14.4836	-0.409828	-0.119201	1.08613
3	14.152	14.4378	-0.285751	3	14.1512	14.4195	-0.268367	0.0222604	0.984689
4	14.1434	14.4456	-0.302203	4	14.0849	14.4163	-0.331387	-0.0407593	1.02866
Average	14.139	14.847	-0.290627	Average	14.1107	14.429	-0.318293	-0.0276661	1.02023
Median	14.1391	14.8312	-0.293977	Median	14.1089	14.4179	-0.299877	-0.00924945	1.00667
SD	0.0113156	0.0710592	0.0233891	SD	0.0372502	0.0377917	0.0683983	0.0683983	0.04893
	P value								0.024465
Acp5	0.196176
PPIA	0.979681							PPIA	Acp5
Ct	0.473027						Blank	25.3614	25.1481
Relative Fold	0.00165911						Blank	24.5846	24.6125
Fold Incr	1.01936

## Sheet: Ctsk
Source Data for Figure 6I
							PPIA	2019-04-24
							Ctsk	2019-04-26
RNA Extractions done by Jasmine Lau
Nano, dilutions and RT done by JL
BMM GFP	Ctsk	PPIA	∆Ct	BMM KSR2OE	Ctsk	PPIA	∆Ct	∆∆Ct
1	13.9542	14.4492	-0.494958	1	13.9548	14.3965	-0.441788	0.0235381	0.983817
2	13.9604	14.3859	-0.425496	2	13.924	14.4836	-0.559552	-0.0942264	1.06749
3	13.9829	14.4378	-0.454885	3	13.934	14.4195	-0.485518	-0.0201917	1.01409
4	13.9596	14.4456	-0.485964	4	13.9284	14.4163	-0.487871	-0.0225453	1.01575
Average	13.9643	14.847	-0.465326	Average	13.9353	14.429	-0.493682	-0.0283563	1.02029
Median	13.96	14.8312	-0.470425	Median	13.9312	14.4179	-0.486694	-0.0213685	1.01492
SD	0.0127102	0.0710592	0.0316196	SD	0.0135958	0.0377917	0.048759	0.048759	0.0347246
	P value								0.0173623
KSR2 (Lewis)	0.0207017
PPIA	0.979681							PPIA	Ctsk
Ct	0.36681						Blank	25.3614	27.3693
Relative Fold	0.00041627						Blank	24.5846	27.3141
Fold Incr	1.01985
