# Supplementary material for: Contrasting effects of Ksr2, an obesity gene, on trabecular bone volume and bone marrow adiposity
Source: eLife. 2022 Nov 7;11:e82810. doi: 10.7554/eLife.82810 (PMC9640193; doi:10.7554/eLife.82810)
Supplement: Figure 7—source data 1. — Source data for Figure 7A–D. [file elife-82810-fig7-data1.xlsx]

## Sheet: 16wk Pixi
Source Data for Figure 7A-7C
AL= Fed ad-lib (at will)
PF= Pair fed (fed the specific amount daily tht the control animal ate on average)
Individual Samples % of Control Animals
BW(g)
	16wks
	Mut AL		Mutant PF
0.9	129.841	1.9	76.4736
0.9	178.702	1.9	96.137
0.9		1.9	102.098
0.9	151.025	1.9	119.226
Averages
BW
Mut AL	Mut PF
153.189	98.4837
10.9578	5.8792
0.0287264	0.853663	pvalue
*significance is to the control of that parameter
%Fat
	16wks
	Mut AL		Mutant PF
0.9	163.663	1.9	83.9285
0.9	142.621	1.9	106.723
0.9	174.737	1.9	117.504
0.9	156.666	1.9	120.083
Averages
%Fat
Mut AL	Mut PF
159.422	107.06
6.01332	8.23539
0.00215443	0.419531	pvalue
*significance is to the control of that parameter
Femur BMD (mg/cm^2)
	16wks
	Mut AL		Mutant PF
0.9	128.485	1.9	113.554
0.9	121.465	1.9	115.918
0.9		1.9	111.442
0.9	109.253	1.9	112.852
Averages
Femur BMD
Mut AL	Mut PF
119.734	113.442
4.86609	0.935017
0.057342	0.0296943	pvalue
*significance is to the control of that parameter

## Sheet: 16wk microCT
Source Data for Figure 7D
Individual Samples
BV/TV
	WT		Mut
0.9	0.1108	1.9	0.2089
0.9	0.0911	1.9	0.2293
0.9	0.0727	1.9	0.1563
0.9	0.0506	1.9	0.1004
0.9	0.0871	1.9	0.0836
0.9	0.1156	1.9	0.1134
0.9	0.0991
Averages
BV/TV
15wk wt	15wk ko
0.0895714	0.14865
0.00849481	0.0244916
	0.0334775	pvalue
