# Supplementary material for: Contrasting effects of Ksr2, an obesity gene, on trabecular bone volume and bone marrow adiposity
Source: eLife. 2022 Nov 7;11:e82810. doi: 10.7554/eLife.82810 (PMC9640193; doi:10.7554/eLife.82810)
Supplement: Figure 7—source data 2. — Source data for Figure 7F-H. [file elife-82810-fig7-data2.xlsx]

## Sheet: Xray_pixi
Source Data for Figure 7F-7H
Individual Samples % of Control Animals
BW(g)
	12wks
	+/het		+/homo
0.9	14.7	1.9	13.7
0.9	12.3	1.9	16.5
0.9	14.7	1.9	15.9
		1.9	15.2
Averages
BW
+/het	+/homo
13.9	14.3
0.8	1.25946
	0.812258	pvalue
%Fat
	12wks
	+/het		+/homo
0.9	54.0417	1.9	50.1253
0.9	43.5762	1.9	47.0857
0.9	54.031	1.9	44.7204
		1.9	48.6466
Averages
%Fat
+/het	+/homo
50.5496	47.6445
3.48672	1.15546
	0.408527	pvalue
Femur BMD (mg/cm^2)
	12wks
	+/het		+/homo
0.9	70.6872	1.9	75.0344
0.9	66.0929	1.9	78.6499
0.9	68.5105	1.9	76.2124
		1.9	75.3663
Averages
Femur BMD
+/het	+/homo
68.4302	76.3158
1.32687	0.816611
	0.00304428	pvalue
