# Supplementary material for: Contrasting effects of Ksr2, an obesity gene, on trabecular bone volume and bone marrow adiposity
Source: eLife. 2022 Nov 7;11:e82810. doi: 10.7554/eLife.82810 (PMC9640193; doi:10.7554/eLife.82810)
Supplement: Figure 7—source data 3. — Source data for Figure 7J–O. [file elife-82810-fig7-data3.xlsx]

## Sheet: FeTrab
Source Data for Figure 7J-70
Individual Samples
BV/TV
	12wks
	wt		cKO
0.9	16.23	1.9	24.91
0.9	13.41	1.9	19.6
0.9	10.15	1.9	18.45
0.9	12	1.9	17.53
0.9	13.57	1.9	11.54
0.9	10	1.9	13.73
0.9	8.23	1.9	12.67
Averages
BV/TV
12wk WT	12wk cKO
11.9414	16.9186
1.02304	1.76553
	0.0312058	pvalue
CONN.D
	12wks
	wt		cKO
0.9	226.07	1.9	266.71
0.9	139.89	1.9	308.07
0.9	110.25	1.9	203.41
0.9	121.74	1.9	215.32
0.9	133.61	1.9	142.71
0.9	101.22	1.9	148.82
0.9	77.38	1.9	155.255
Averages
CONN.D
12wk WT	12wk cKO
130.023	205.756
47.2506	63.308
	0.0261081	pvalue
SMI
	12wks
	wt		cKO
0.9	2.18	1.9	1.43
0.9	2.43	1.9	1.83
0.9	2.78	1.9	1.96
0.9	2.65	1.9	1.93
0.9	2.42	1.9	2.48
0.9	2.78	1.9	2.34
0.9	3.09	1.9	2.3322
Averages
SMI
12wk WT	12wk cKO
2.61857	2.04317
0.300745	0.365971
	0.00743902	pvalue
Tb.N
	12wks
	wt		cKO
0.9	5.6	1.9	5.65
0.9	4.8	1.9	5.91
0.9	4.31	1.9	5.6
0.9	4.44	1.9	5.14
0.9	4.7	1.9	4.42
0.9	4.27	1.9	4.49
0.9	4.05	1.9	4.5928
Averages
Tb.N
12wk WT	12wk cKO
4.59571	5.11469
0.511692	0.619199
	0.113093	pvalue
Tb.th
	12wks
	wt		cKO
0.9	44.7	1.9	55
0.9	46.4	1.9	44.3
0.9	44.1	1.9	48.8
0.9	49.5	1.9	47.3
0.9	48.9	1.9	43.2
0.9	44.8	1.9	47.6
0.9	44.3	1.9	43.6
Averages
Tb.Th
12wk WT	12wk cKO
46.1	47.1143
0.85049	1.54987
	0.576748	pvalue
Tb.S
	12wks
	wt		cKO
0.9	173.4	1.9	168.9
0.9	202.7	1.9	164.5
0.9	231.2	1.9	173.4
0.9	225.6	1.9	193.5
0.9	210.5	1.9	223
0.9	233.6	1.9	224.5
0.9	246.2	1.9	211.4
Averages
Tb.S
12wk WT	12wk cKO
217.6	194.171
9.19236	9.06493e-17
	0.106032	pvalue
