# Supplementary material for: Contrasting effects of Ksr2, an obesity gene, on trabecular bone volume and bone marrow adiposity
Source: eLife. 2022 Nov 7;11:e82810. doi: 10.7554/eLife.82810 (PMC9640193; doi:10.7554/eLife.82810)
Supplement: Figure 8—source data 1. — Average fold changes plotted and t-test values are highlighted in yellow. Source data for Figure 8A. [file elife-82810-fig8-data1.xlsx]

## Sheet: Sheet2
Source Data for Figure 8A.
							PPIA	2019-06-14
24 hours serum free, 72 hour treatment							Alpl	2019-06-17
RNA Extractions done by Jasmine Lau
Nano, dilutions and RT done by JL
ST2 GFP	Alpl	PPIA	∆Ct	ST2 KSR2 OE	Alpl	PPIA	∆Ct	∆∆Ct
Normal Glucose No Insulin	25.289	14.56	10.729	Normal Glucose No Insulin	28.5002	14.5499	13.9503	2.51702	0.174704
Normal Glucose No Insulin	26.2697	14.5545	11.7151	Normal Glucose No Insulin	27.3659	14.5946	12.7713	1.33804	0.395557
Normal Glucose No Insulin	25.965	14.608	11.3571	Normal Glucose No Insulin	28.4597	14.5899	13.8698	2.43653	0.184727
Normal Glucose No Insulin	26.4735	14.5416	11.932	Normal Glucose No Insulin	27.3711	14.5756	12.7956	1.36226	0.388972
Average	25.9993	14.847	11.4333	Average	27.9243	14.5775	13.3468	1.91346	0.28599
Median	26.1173	14.8312	11.5361	Median	27.9154	14.5827	13.3327	1.8994	0.28685
SD	0.517597	0.0710592	0.525982	SD	0.641914	0.0200793	0.651362	0.651362	0.122813
	P value								0.0614066
KSR2 (Lewis)	0.00343563
PPIA	0.539125
Ct	0.00380638
Relative Fold	6.57833
Fold Incr	0.265454
ST2 GFP	Alpl	PPIA	∆Ct	ST2 KSR2 OE	Alpl	PPIA	∆Ct	∆∆Ct
Normal Glucose + Insulin	27.2901	14.531	12.7591	Normal Glucose + Insulin	30.5634	15.0022	15.5612	2.65206	0.159092
Normal Glucose + Insulin	27.6936	14.5305	13.1631	Normal Glucose + Insulin	28.753	14.6792	14.0739	1.16478	0.446032
Normal Glucose + Insulin	27.1713	14.538	12.6333	Normal Glucose + Insulin	29.7109	14.6608	15.05	2.14096	0.226729
Normal Glucose + Insulin	27.625	14.5441	13.0809	Normal Glucose + Insulin
Average	27.445	14.847	12.9091	Average	29.6758	14.7807	14.895	1.98593	0.277285
Median	27.4575	14.8312	12.92	Median	29.7109	14.6792	15.05	2.14096	0.226729
SD	0.253722	0.0710592	0.253392	SD	0.905672	0.192023	0.755664	0.755664	0.150002
	P value								0.0750009
KSR2 (Lewis)	0.00478525
PPIA	0.0461214
Ct	0.00399156
Relative Fold	7.51636
Fold Incr	0.252449
ST2 GFP	Alpl	PPIA	∆Ct	ST2 KSR2 OE	Alpl	PPIA	∆Ct	∆∆Ct
High Glucose	26.1933	14.54	11.6533	High Glucose	28.527	14.5905	13.9364	2.40325	0.189038
High Glucose	26.3194	14.5634	11.756	High Glucose
High Glucose	25.9389	14.5198	11.4191	High Glucose	28.9335	14.5902	14.3433	2.81008	0.142587
High Glucose	25.8531	14.5487	11.3043	High Glucose	28.9008	14.5926	14.3082	2.77501	0.146096
Average	26.0762	14.847	11.5332	Average	28.7871	14.5911	14.196	2.66278	0.15924
Median	26.0661	14.8312	11.5362	Median	28.9008	14.5905	14.3082	2.77501	0.146096
SD	0.217189	0.0710592	0.20776	SD	0.225861	0.00128516	0.225444	0.225444	0.0258651
	P value								0.0129326
KSR2 (Lewis)	1.6931e-05
PPIA	0.00662027
Ct	1.62612e-05
Relative Fold	8.34185
Fold Incr	0.157915
ST2 GFP	Alpl	PPIA	∆Ct	ST2 KSR2 OE	Alpl	PPIA	∆Ct	∆∆Ct
High Glucose + Insulin	27.4848	14.5314	12.9534	High Glucose + Insulin	29.8478	14.9776	14.8703	2.06556	0.238894
High Glucose + Insulin	27.4134	14.5692	12.8441	High Glucose + Insulin	28.2669	14.642	13.6249	0.820223	0.566354
High Glucose + Insulin	27.7575	14.5278	13.2298	High Glucose + Insulin	27.9977	14.603	13.3947	0.589963	0.66436
High Glucose + Insulin	26.7765	14.5849	12.1915	High Glucose + Insulin	28.0955	14.6457	13.4497	0.645055	0.639468
Average	27.358	14.847	12.8047	Average	28.552	14.7171	13.8349	1.0302	0.527269
Median	27.4491	14.8312	12.8987	Median	28.1812	14.6438	13.5373	0.732639	0.602911
SD	0.415113	0.0710592	0.439823	SD	0.871037	0.174732	0.697186	0.697186	0.196698
	P value								0.0983491
KSR2 (Lewis)	0.0481487
PPIA	0.113783
Ct	0.0465598
Relative Fold	2.98386
Fold Incr	0.489642
