# Supplementary material for: Contrasting effects of Ksr2, an obesity gene, on trabecular bone volume and bone marrow adiposity
Source: eLife. 2022 Nov 7;11:e82810. doi: 10.7554/eLife.82810 (PMC9640193; doi:10.7554/eLife.82810)
Supplement: Figure 8—source data 2. — Note that membranes probed for RPS6 and p-RPS6 were exposed simultaneously, as were corresponding membranes probed with β-actin. Western blot. [file elife-82810-fig8-data2.xlsx]

## Sheet: Unedited WB Image
Source Data for Figure 8B				Note: the identities of lanes is the same throughout
				CONtrol on left, INSULIN treated in center, IGF1 treated on right
