# Supplementary material for: Contrasting effects of Ksr2, an obesity gene, on trabecular bone volume and bone marrow adiposity
Source: eLife. 2022 Nov 7;11:e82810. doi: 10.7554/eLife.82810 (PMC9640193; doi:10.7554/eLife.82810)
Supplement: Figure 8—source data 5. — Source data for Figure 8C. [file elife-82810-fig8-data5.xlsx]

## Sheet: WB quantified
Source Data for Figure 8C
ST2 Low Glucose - Phospho S6RP							ST2 Low Glucose - Total S6RP								Ratio:	Phos/Total
		Mean	Corrected	Avg	SD	SEM			Mean	Corrected	Avg	SD	SEM				avg	SD	SEM	ttest
GFP	Cnt 1	17275.9	48.064				GFP	Cnt 1	13536.8	3787.25				GFP	Cnt 1	0.012691
	Cnt 2	17216.2	107.766					Cnt 2	14039.2	3284.84					Cnt 2	0.0328071
	Cnt 3	17119.4	204.62	120.15	79.0093	45.616		Cnt 3	13667	3656.97	3576.35	260.724	150.529		Cnt 3	0.0559535	0.0338172	0.0216489	0.012499
	Insulin 1	16186	1138.03					Insulin 1	13755.5	3568.47					Insulin 1	0.318913
	Insulin 2	15423.7	1900.31					Insulin 2	12962.7	4361.27					Insulin 2	0.435724				vs Cnt tx
	Insulin 3	15897.1	1426.95	1488.43	384.841	222.188		Insulin 3	13576.9	3747.1	3892.28	415.863	240.099		Insulin 3	0.380813	0.378484	0.0584403	0.0337405	0.000663662
	IGF-1 1	16076	1247.99					IGF-1 1	13677.6	3646.36					IGF-1 1	0.342256
	IGF-1 2	16153.4	1170.64					IGF-1 2	13602	3721.99					IGF-1 2	0.31452				vs Cnt tx
	IGF-1 3	16129.1	1194.87	1204.5	39.5615	22.8408		IGF-1 3	13199	4124.99	3831.11	257.298	148.551		IGF-1 3	0.289666	0.31548	0.026308	0.0151889	0.000138197
KSR2OE	Cnt 1	17011.2	312.785				KSR2OE	Cnt 1	12055.1	5268.93				KSR2OE	Cnt 1	0.059364
	Cnt 2	17174.9	149.136					Cnt 2	13518.8	3805.2					Cnt 2	0.0391927
	Cnt 3	17117.2	206.776	222.899	83.0073	47.9243		Cnt 3	12685	4638.98	4571.04	734.227	423.906		Cnt 3	0.0445736	0.0477101	0.010445	0.00603045
	Insulin 1	17086.3	237.664					Insulin 1	14587	2736.96					Insulin 1	0.0868352
	Insulin 2	16588	736.012					Insulin 2	13012.5	4311.55					Insulin 2	0.170707				vs Cnt tx
	Insulin 3	16572.9	751.07	574.915	292.165	168.682		Insulin 3	13173.7	4150.32	3732.94	866.308	500.163		Insulin 3	0.180967	0.14617	0.0516406	0.0298147	0.0317691
	IGF-1 1	16713.3	610.715					IGF-1 1	14184.1	3139.87					IGF-1 1	0.194503
	IGF-1 2	16731	592.964					IGF-1 2	13740.6	3583.45					IGF-1 2	0.165473				vs Cnt tx
	IGF-1 3	16491.2	832.764	678.814	133.619	77.1452		IGF-1 3	13365.9	3958.06	3560.46	409.576	236.469		IGF-1 3	0.210397	0.190124	0.0227799	0.013152	0.000597494
	Blank	17324	0
														ttest	Cnt vs Cnt	0.373432
															Ins vs Ins	0.00670011
															Igf-1 vs Igf-1	0.00336275
