# Supplementary material for: Contrasting effects of Ksr2, an obesity gene, on trabecular bone volume and bone marrow adiposity
Source: eLife. 2022 Nov 7;11:e82810. doi: 10.7554/eLife.82810 (PMC9640193; doi:10.7554/eLife.82810)
Supplement: Figure 8—source data 6. — Average fold changes plotted and t-test values are highlighted in yellow. Source data for Figure 8E. [file elife-82810-fig8-data6.xlsx]

## Sheet: Ibsp
Source Data for Figure 8E
									2020-02-28	PPIA
									2020-02-28	Ibsp
										SP
serum free 24h, treat 48h
Cntrl shRNA	Ibsp	PPIA	∆Ct	Cntrl shRNA	Ibsp	PPIA	∆Ct	∆∆Ct
DMSO 1	23.7471	15.2104	8.53666	Rapamycin 1
DMSO 2	23.7213	15.0071	8.71416	Rapamycin 2	27.7583	15.5741	12.1842	3.63197	0.0806618
DMSO 3	23.586	14.9185	8.66747	Rapamycin 3	27.5705	15.8255	11.745	3.1928	0.109363
DMSO 4	23.2303	14.9396	8.29066	Rapamycin 4	26.8873	15.6361	11.2512	2.69892	0.154008
Average	23.5712	15.0189	8.55223	Average	27.4054	15.6786	11.7268	3.17456	0.114678
Median	23.6536	14.9734	8.60206	Median	27.5705	15.6361	11.745	3.1928	0.109363
SD	0.237965	0.133132	0.189877	SD	0.458416	0.130951	0.466793	0.466793	0.036961
	P value								0.0184805
Ibsp	2.71138e-05			Rapamycin 1	27.4005	14.8043
PPIA	0.00126005							PPIA	Ibsp
Ct	5.5884e-05						Blank	27.4371	33.3139
Relative Fold	13.2595						Blank	27.0644	35.2642
Fold Incr	0.110754
Cntrl shRNA	Ibsp	PPIA	∆Ct	KSR2 shRNA	Ibsp	PPIA	∆Ct	∆∆Ct
DMSO 1	23.7471	15.2104	8.53666	DMSO 1	21.5352	14.9243	6.61089	-1.94134	3.84063
DMSO 2	23.7213	15.0071	8.71416	DMSO 2	21.8985	14.8941	7.00435	-1.54789	2.92389
DMSO 3	23.586	14.9185	8.66747	DMSO 3	21.7503	14.9342	6.81615	-1.73609	3.33131
DMSO 4	23.2303	14.9396	8.29066	DMSO 4	21.7742	14.9236	6.85068	-1.70156	3.25252
Average	23.5712	15.0189	8.55223	Average	21.7395	14.919	6.82052	-1.73172	3.33709
Median	23.6536	14.9734	8.60206	Median	21.7623	14.9239	6.83341	-1.71882	3.29191
SD	0.237965	0.133132	0.189877	SD	0.150941	0.0172884	0.16193	0.16193	0.37924
	P value								0.18962
Ibsp	1.2763e-05
PPIA	0.187239
Ct	8.71387e-06
Relative Fold	2.46424
Fold Incr	3.32123
Cntrl shRNA	Ibsp	PPIA	∆Ct	KSR2 shRNA	Ibsp	PPIA	∆Ct	∆∆Ct
DMSO 1	23.7471	15.2104	8.53666	Rapamycin 1	24.5398	15.3212	9.21866	0.666428	0.630065
DMSO 2	23.7213	15.0071	8.71416	Rapamycin 2	25.1636	15.5105	9.65313	1.10089	0.466228
DMSO 3	23.586	14.9185	8.66747	Rapamycin 3	25.2522	15.3979	9.85427	1.30204	0.405553
DMSO 4	23.2303	14.9396	8.29066	Rapamycin 4	25.9621	15.7494	10.2127	1.66042	0.316346
Average	23.5712	15.0189	8.55223	Average	25.2294	15.4947	9.73468	1.18245	0.454548
Median	23.6536	14.9734	8.60206	Median	25.2079	15.4542	9.7537	1.20147	0.43589
SD	0.237965	0.133132	0.189877	SD	0.582295	0.186749	0.414605	0.414605	0.132216
	P value								0.0661078
Ibsp	0.00187906
PPIA	0.00601606
Ct	0.00204243
Relative Fold	2.55057
Fold Incr	0.440604

## Sheet: Sp7
Source Data for Figure 8E
									2020-02-28	PPIA
									2020-02-28	Sp7
										SP
serum free 24h, treat 48h
Cntrl shRNA	Sp7	PPIA	∆Ct	Cntrl shRNA	Sp7	PPIA	∆Ct	∆∆Ct
DMSO 1	27.3518	15.2104	12.1414	Rapamycin 1	28.5518	14.8043	13.7475	1.4699	0.361008
DMSO 2	27.409	15.0071	12.4018	Rapamycin 2	29.6365	15.5741	14.0624	1.78473	0.29023
DMSO 3	27.1709	14.9185	12.2524	Rapamycin 3	29.1842	15.8255	13.3587	1.08109	0.472672
DMSO 4	27.2546	14.9396	12.3149	Rapamycin 4	29.5826	15.6361	13.9465	1.66886	0.314501
Average	27.2966	15.0189	12.2777	Average	29.2388	15.46	13.7788	1.50115	0.359603
Median	27.3032	14.9734	12.2837	Median	29.3834	15.6051	13.847	1.56938	0.337755
SD	0.105264	0.133132	0.109557	SD	0.50043	0.450029	0.308747	0.308747	0.0808977
	P value								0.0404489
Sp7	0.000270946
PPIA	0.109207							PPIA	Sp7
Ct	9.50572e-05						Blank	27.4371	Undetermined
Relative Fold	3.27571						Blank	27.0644	Undetermined
Fold Incr	0.353273
Cntrl shRNA	Sp7	PPIA	∆Ct	KSR2 shRNA	Sp7	PPIA	∆Ct	∆∆Ct
DMSO 1	27.3518	15.2104	12.1414	DMSO 1	24.462	14.9243	9.53774	-2.73991	6.68029
DMSO 2	27.409	15.0071	12.4018	DMSO 2	24.4651	14.8941	9.57102	-2.70663	6.52797
DMSO 3	27.1709	14.9185	12.2524	DMSO 3	24.1507	14.9342	9.21654	-3.06112	8.34618
DMSO 4	27.2546	14.9396	12.3149	DMSO 4	24.3382	14.9236	9.41459	-2.86306	7.27557
Average	27.2966	15.0189	12.2777	Average	24.354	14.919	9.43497	-2.84268	7.2075
Median	27.3032	14.9734	12.2837	Median	24.4001	14.9239	9.47617	-2.80149	6.97793
SD	0.105264	0.133132	0.109557	SD	0.147882	0.0172884	0.160416	0.160416	0.82481
	P value								0.412405
Sp7	5.72562e-08
PPIA	0.187239
Ct	1.05454e-07
Relative Fold	7.19454
Fold Incr	7.17352
Cntrl shRNA	Sp7	PPIA	∆Ct	KSR2 shRNA	Sp7	PPIA	∆Ct	∆∆Ct
DMSO 1	27.3518	15.2104	12.1414	Rapamycin 1
DMSO 2	27.409	15.0071	12.4018	Rapamycin 2	27.7518	15.5105	12.2414	-0.0362976	1.02548
DMSO 3	27.1709	14.9185	12.2524	Rapamycin 3	27.4662	15.3979	12.0683	-0.209332	1.15615
DMSO 4	27.2546	14.9396	12.3149	Rapamycin 4	27.4838	15.7494	11.7343	-0.543315	1.45732
Average	27.2966	15.0189	12.2777	Average	27.5673	15.5526	12.0147	-0.262981	1.21298
Median	27.3032	14.9734	12.2837	Median	27.4838	15.5105	12.0683	-0.209332	1.15615
SD	0.105264	0.133132	0.109557	SD	0.160081	0.179512	0.257731	0.257731	0.221457
	P value								0.110729
Sp7	0.0414596
PPIA	0.00608074
Ct	0.119849
Relative Fold	2.75675e-05
Fold Incr	1.19996

## Sheet: Vegfa
Source Data for Figure 8E
									2020-02-28	PPIA
									2020-02-28	Vegfa
										SP
serum free 24h, treat 48h
Cntrl shRNA	Vegfa	PPIA	∆Ct	Cntrl shRNA	Vegfa	PPIA	∆Ct	∆∆Ct
DMSO 1	20.3209	15.2104	5.11047	Rapamycin 1	20.7038	14.8043	5.89951	0.529255	0.692912
DMSO 2	20.4212	15.0071	5.41407	Rapamycin 2	21.8127	15.5741	6.23857	0.868316	0.547786
DMSO 3	20.3275	14.9185	5.40896	Rapamycin 3	22.1611	15.8255	6.33557	0.965311	0.512168
DMSO 4	20.4872	14.9396	5.54751	Rapamycin 4	21.637	15.6361	6.00088	0.630625	0.645897
Average	20.3892	15.0189	5.37025	Average	21.5786	15.46	6.11863	0.748377	0.599691
Median	20.3743	14.9734	5.41151	Median	21.7248	15.6051	6.11972	0.74947	0.596841
SD	0.0797831	0.133132	0.184684	SD	0.62256	0.450029	0.202753	0.202753	0.084023
	P value								0.0420115
Vegfa	0.00907178
PPIA	0.109207							PPIA	Vegfa
Ct	0.00157627						Blank	27.4371
Relative Fold	0.904647						Blank	27.0644
Fold Incr	0.595273
Cntrl shRNA	Vegfa	PPIA	∆Ct	KSR2 shRNA	Vegfa	PPIA	∆Ct	∆∆Ct
DMSO 1	20.3209	15.2104	5.11047	DMSO 1	19.359	14.9243	4.43473	-0.935526	1.91259
DMSO 2	20.4212	15.0071	5.41407	DMSO 2	19.8665	14.8941	4.97241	-0.397841	1.31753
DMSO 3	20.3275	14.9185	5.40896	DMSO 3	19.2316	14.9342	4.29743	-1.07282	2.10355
DMSO 4	20.4872	14.9396	5.54751	DMSO 4	19.4923	14.9236	4.56878	-0.801477	1.74288
Average	20.3892	15.0189	5.37025	Average	19.4874	14.919	4.56834	-0.801917	1.76914
Median	20.3743	14.9734	5.41151	Median	19.4257	14.9239	4.50175	-0.868501	1.82774
SD	0.0797831	0.133132	0.184684	SD	0.274289	0.0172884	0.291273	0.291273	0.335182
	P value								0.167591
Vegfa	0.000736825
PPIA	0.187239
Ct	0.0035026
Relative Fold	0.260758
Fold Incr	1.74342
Cntrl shRNA	Vegfa	PPIA	∆Ct	KSR2 shRNA	Vegfa	PPIA	∆Ct	∆∆Ct
DMSO 1	20.3209	15.2104	5.11047	Rapamycin 1	20.9078	15.3212	5.58669	0.216436	0.860689
DMSO 2	20.4212	15.0071	5.41407	Rapamycin 2	21.5715	15.5105	6.06098	0.690722	0.619544
DMSO 3	20.3275	14.9185	5.40896	Rapamycin 3	21.4223	15.3979	6.02436	0.654106	0.635469
DMSO 4	20.4872	14.9396	5.54751	Rapamycin 4	21.8816	15.7494	6.13215	0.7619	0.589719
Average	20.3892	15.0189	5.37025	Average	21.4458	15.4947	5.95105	0.580791	0.676355
Median	20.3743	14.9734	5.41151	Median	21.4969	15.4542	6.04267	0.672414	0.627506
SD	0.0797831	0.133132	0.184684	SD	0.406468	0.186749	0.246992	0.246992	0.124344
	P value								0.0621718
Vegfa	0.00221797
PPIA	0.00601606
Ct	0.0093278
Relative Fold	0.685225
Fold Incr	0.668597
