# Supplementary material for: Contrasting effects of Ksr2, an obesity gene, on trabecular bone volume and bone marrow adiposity
Source: eLife. 2022 Nov 7;11:e82810. doi: 10.7554/eLife.82810 (PMC9640193; doi:10.7554/eLife.82810)
Supplement: Figure 8—source data 7. — Average fold changes plotted and t-test values are highlighted in yellow. Source data for Figure 8F, G. [file elife-82810-fig8-data7.xlsx]

## Sheet: Vegfa
Source Data for Figure 8F-8G							PPIA	2019-06-13
							Vegfa	2019-06-19
RNA Extractions done by Jasmine Lau
Nano, dilutions and RT done by JL
BMSC GFP	Vegfa	PPIA	∆Ct	BMSC KSR2OE	Vegfa	PPIA	∆Ct	∆∆Ct
BAA 1	19.1647	14.7861	4.37857	BAA 1	19.6436	14.6551	4.98851	0.327834	0.796732
BAA 2	19.6757	14.8323	4.84334	BAA 2	20.5954	14.9953	5.60003	0.93936	0.521464
BAA 3	19.5311	14.9302	4.60087	BAA 3	19.4019	14.6476	4.75428	0.093606	0.937177
BAA 4	19.6263	14.8064	4.81992	BAA 4	20.141	14.7406	5.40044	0.739766	0.598836
Average	19.4994	14.847	4.66067	Average	19.9455	14.7597	5.18582	0.525141	0.713552
Median	19.5787	14.8312	4.71039	Median	19.8923	14.6978	5.19447	0.5338	0.697784
SD	0.231103	0.0710592	0.217477	SD	0.531411	0.162679	0.384185	0.384185	0.188843
	P value								0.0944213
Vegfa	0.174624
PPIA	0.400211							PPIA	Vegfa
Ct	0.0548378						Blank	33.5132	Undetermined
Relative Fold	0.826874						Blank	31.6102	Undetermined
Fold Incr	0.694891

## Sheet: Glut1
Source Data for Figure 8F-8G
							PPIA	2019-06-13
							Glut1	2019-06-18
RNA Extractions done by Jasmine Lau
Nano, dilutions and RT done by JL
BMSC GFP	Glut1	PPIA	∆Ct	BMSC KSR2OE	Glut1	PPIA	∆Ct	∆∆Ct
BAA 1	18.6588	14.7861	3.8727	BAA 1	20.2639	14.6551	5.60881	1.41342	0.37542
BAA 2	19.3611	14.8323	4.52874	BAA 2	19.6939	14.9953	4.69859	0.50321	0.705535
BAA 3	18.8517	14.9302	3.92148	BAA 3	19.4275	14.6476	4.77989	0.584506	0.666878
BAA 4	19.265	14.8064	4.45861	BAA 4	19.6501	14.7406	4.90951	0.714127	0.609574
Average	19.0341	14.847	4.19538	Average	19.7589	14.7597	4.9992	0.803817	0.589352
Median	19.0583	14.8312	4.19004	Median	19.672	14.6978	4.8447	0.649316	0.638226
SD	0.333844	0.0710592	0.346202	SD	0.356347	0.162679	0.415583	0.415583	0.147969
	P value								0.0739847
Glut1	0.0250111
PPIA	0.400211
Ct	0.024887
Relative Fold	1.48693
Fold Incr	0.572832

## Sheet: PGK1
Source Data for Figure 8F-8G
							PPIA	2019-06-13
							PGK1	2019-06-18
RNA Extractions done by Jasmine Lau
Nano, dilutions and RT done by JL
BMSC GFP	PGK1	PPIA	∆Ct	BMSC KSR2OE	PGK1	PPIA	∆Ct	∆∆Ct
BAA 1	16.2143	14.7861	1.42823	BAA 1	17.9611	14.6551	3.30593	1.67059	0.314125
BAA 2	16.6767	14.8323	1.8444	BAA 2	17.1665	14.9953	2.17118	0.535837	0.689759
BAA 3	16.2905	14.9302	1.36033	BAA 3	16.9225	14.6476	2.27493	0.639586	0.641897
BAA 4	16.7148	14.8064	1.9084	BAA 4	17.004	14.7406	2.26348	0.628144	0.647008
Average	16.4741	14.847	1.63534	Average	17.2635	14.7597	2.50388	0.868539	0.573197
Median	16.4836	14.8312	1.63631	Median	17.0853	14.6978	2.2692	0.633865	0.644453
SD	0.258308	0.0710592	0.280945	SD	0.475942	0.162679	0.536714	0.536714	0.174043
	P value								0.0870214
PGK1	0.0267827
PPIA	0.400211
Ct	0.0285233
Relative Fold	1.97474
Fold Incr	0.547701

## Sheet: Hey1
Source Data for Figure 8F-8G
							PPIA	2019-06-13
							Hey1	2019-06-19
RNA Extractions done by Jasmine Lau
Nano, dilutions and RT done by JL
BMSC GFP	Hey1	PPIA	∆Ct	BMSC KSR2OE	Hey1	PPIA	∆Ct	∆∆Ct
BAA 1	24.7363	14.7861	9.95023	BAA 1	24.6363	14.6551	9.98116	-0.0715342	1.05083
BAA 2	25.1997	14.8323	10.3674	BAA 2	25.3088	14.9953	10.3134	0.260757	0.83465
BAA 3	24.7745	14.9302	9.84433	BAA 3	24.6011	14.6476	9.95349	-0.0991983	1.07118
BAA 4	24.8552	14.8064	10.0488	BAA 4	24.8887	14.7406	10.1481	0.0954218	0.935999
Average	24.8914	14.847	10.0527	Average	24.8587	14.7597	10.0991	0.0463617	0.973165
Median	24.8149	14.8312	9.99952	Median	24.7625	14.6978	10.0646	0.0119438	0.993416
SD	0.211405	0.0710592	0.225804	SD	0.326244	0.162679	0.166793	0.166793	0.109859
	P value								0.0549294
Hey1 CA	0.871783
PPIA	0.400211							PPIA	Hey1 CA
Ct	0.752403						Blank	33.5132	Undetermined
Relative Fold	0.0454349						Blank	31.6102	Undetermined
Fold Incr	0.968375

## Sheet: Hey2
Source Data for Figure 8F-8G
							PPIA	2019-06-13
							Hey2	2019-06-19
RNA Extractions done by Jasmine Lau
Nano, dilutions and RT done by JL
BMSC GFP	Hey2	PPIA	∆Ct	BMSC KSR2OE	Hey2	PPIA	∆Ct	∆∆Ct
BAA 1	25.4268	14.7861	10.6407	BAA 1	25.5792	14.6551	10.9241	0.285864	0.82025
BAA 2	25.3069	14.8323	10.4746	BAA 2
BAA 3	25.6542	14.9302	10.724	BAA 3	25.6209	14.6476	10.9732	0.335001	0.792783
BAA 4	25.52	14.8064	10.7136	BAA 4	25.435	14.7406	10.6944	0.0561528	0.961826
Average	25.477	14.847	10.6382	Average	25.545	14.6811	10.8639	0.225673	0.858286
Median	25.4734	14.8312	10.6772	Median	25.5792	14.6551	10.9241	0.285864	0.82025
SD	0.146853	0.0710592	0.115218	SD	0.0975584	0.0516327	0.14885	0.14885	0.0907132
	P value								0.0453566
Hey2	0.52199
PPIA	0.0175859							PPIA	Hey2
Ct	0.071738						Blank	33.5132	Undetermined
Relative Fold	0.140268						Blank	31.6102	38.1064
Fold Incr	0.855196
