# Supplementary material for: Contrasting effects of Ksr2, an obesity gene, on trabecular bone volume and bone marrow adiposity
Source: eLife. 2022 Nov 7;11:e82810. doi: 10.7554/eLife.82810 (PMC9640193; doi:10.7554/eLife.82810)
Supplement: Figure 8—source data 8. — Average fold changes plotted and t-test values are highlighted in yellow. Source data for Figure 8H. [file elife-82810-fig8-data8.xlsx]

## Sheet: Hif1a
Source Data for Figure 8H
								PPIA	2022-01-19
								Hif1a	2022-01-19
RNA Extractions done by JL
Original Nano and dilutions by JL
Mice were 12 wks old at termination
Control	Hif1a	PPIA	∆Ct	Mutant	Hif1a	PPIA	∆Ct	∆∆Ct
M/601	19.7306	15.2281	4.50247	M/613	18.8623	15.2821	3.58025	-0.773105	1.70894
M/607	19.7169	15.2805	4.43645	M/619	19.3977	15.2003	4.19742	-0.155942	1.11415
F/640	19.8758	15.3361	4.53969	F/634	19.8175	15.5839	4.23358	-0.119779	1.08657
F/642	19.2512	15.0346	4.21655	F/638	19.1031	15.1591	3.94392	-0.409442	1.32817
M/643	19.9581	15.6694	4.28878	M/795
M/654	18.9457	14.7692	4.17646
F/646
F/722
F/724	19.6737	15.3606	4.31312
Average	19.5931	15.2398	4.35336	Average	19.2951	15.3064	3.98879	-0.364567	1.30946
Median	19.7169	15.2805	4.31312	Median	19.2504	15.2412	4.07067	-0.282692	1.22116
SD	0.362851	0.280989	0.141219	SD	0.411346	0.19197	0.30131	0.30131	0.287382
	P value								0.143691
Hif1a	0.242115
PPIA	0.686466							PPIA	Hif1a
Ct	0.0211595						Blank	32.2063	39.9074
Relative Fold	0.00400147						Blank	32.0059	36.7066
Fold Incr	1.2875

## Sheet: Hif2a
Source Data for Figure 8H
								PPIA	2022-01-26
								Hif2a	2022-02-10
RNA Extractions done by JL
Original Nano and dilutions by JL
Mice were 12 wks old at termination
Control	Hif2a	PPIA	∆Ct	Mutant	Hif2a	PPIA	∆Ct	∆∆Ct
M/601	19.2011	15.0177	4.18337	M/613	18.8121	15.1515	3.6607	-0.126135	1.09137
M/607	19.0169	15.0307	3.98625	M/619	18.6635	15.0036	3.65991	-0.126926	1.09196
F/640	18.8685	15.2049	3.66356	F/634	18.8532	15.2812	3.57209	-0.214743	1.1605
F/642	18.3463	14.9431	3.4032	F/638	18.581	14.9891	3.59187	-0.194965	1.1447
M/643	19.0419	15.1069	3.93498	M/795	18.9376	15.0175	3.92014	0.133312	0.911736
M/654	18.7962	14.8208	3.97536
F/646	18.4941	15.1744	3.31976
F/722	18.7379	14.9749	3.76301
F/724	19.0048	15.1528	3.85199
Average	18.8342	15.0474	3.78683	Average	18.7695	15.0886	3.68094	-0.105891	1.08005
Median	18.8685	15.0307	3.85199	Median	18.8121	15.0175	3.65991	-0.126926	1.09196
SD	0.275187	0.1246	0.282807	SD	0.144808	0.12571	0.139511	0.139511	0.0990588
	P value								0.0443004
Hif2a	0.637237
PPIA	0.565472							PPIA	Hif2a
Ct	0.452607						Blank	34.7875	37.1349
Relative Fold	0.00113029						Blank	30.9021	Undetermined
Fold Incr	1.07616

## Sheet: Vegfa
Source Data for Figure 8H
								PPIA	2020-01-02
								Vegfa	2020-01-07
RNA Extractions done by JL
Original Nano and dilutions by JL
Mice were 12 wks old at termination
Control	Vegfa	PPIA	∆Ct	Mutant	Vegfa	PPIA	∆Ct	∆∆Ct
M/601	21.2283	15.2816	5.94662	M/613	20.9025	15.2059	5.69668	-0.51474	1.42874
M/607	21.1908	15.2216	5.96927	M/619	21.0103	15.274	5.73624	-0.475177	1.39009
F/640	21.4013	15.3022	6.09907	F/634	21.2145	15.0332	6.18128	-0.030135	1.02111
F/642				F/638	21.097	15.2769	5.82003	-0.391389	1.31166
M/643	21.9222	15.5839	6.33836	M/795	20.693	15.1255	5.56742	-0.644002	1.56266
M/654	21.5225	14.9185	6.604
F/646
F/722	21.1741	15.0216	6.1525
F/724	21.6339	15.2638	6.37013
Average	21.439	15.2276	6.21142	Average	20.9834	15.1831	5.80033	-0.411088	1.34285
Median	21.4013	15.2638	6.1525	Median	21.0103	15.2059	5.73624	-0.475177	1.39009
SD	0.275702	0.213991	0.238141	SD	0.198696	0.104125	0.231632	0.231632	0.201503
	P value								0.0901151
Vegfa	0.0105129
PPIA	0.679255							PPIA	Vegfa
Ct	0.0137974						Blank	31.5902	37.8476
Relative Fold	0.0322047						Blank	31.6995	33.2653
Fold Incr	1.32969

## Sheet: Pgk1
Source Data for Figure 8H
								PPIA	2020-01-02
								PGK1	2020-01-07
RNA Extractions done by JL
Original Nano and dilutions by JL
Mice were 12 wks old at termination
Control	PGK1	PPIA	∆Ct	Mutant	PGK1	PPIA	∆Ct	∆∆Ct
M/601	17.6737	15.2816	2.39204	M/613	17.6707	15.2059	2.46481	0.052415	0.964321
M/607	17.2931	15.2216	2.07154	M/619	17.5767	15.274	2.30266	-0.109735	1.07903
F/640	17.7834	15.3022	2.48115	F/634
F/642	17.4862	15.1704	2.31576	F/638	17.3407	15.2769	2.06373	-0.348669	1.27339
M/643	18.0015	15.5839	2.41761	M/795	17.5598	15.1255	2.4343	0.0219022	0.984933
M/654	17.4553	14.9185	2.5368
F/646	17.4004	15.2662	2.13417
F/722	17.8065	15.0216	2.7849
F/724	17.8414	15.2638	2.5776
Average	17.6379	15.2255	2.4124	Average	17.537	15.2206	2.31637	-0.0960218	1.07542
Median	17.6737	15.2638	2.41761	Median	17.5683	15.2399	2.36848	-0.0439166	1.03198
SD	0.23878	0.186907	0.220688	SD	0.139665	0.07137	0.182536	0.182536	0.141108
	P value								0.0705539
PGK1	0.453721
PPIA	0.960909							PPIA	PGK1
Ct	0.464719						Blank	31.5902	36.5281
Relative Fold	0.00748471						Blank	31.6995	33.6219
Fold Incr	1.06882

## Sheet: Ldha
Source Data for Figure 8H
								PPIA	2022-01-26
								LDHA	2022-02-10
RNA Extractions done by JL
Original Nano and dilutions by JL
Mice were 12 wks old at termination
Control	LDHA	PPIA	∆Ct	Mutant	LDHA	PPIA	∆Ct	∆∆Ct
M/601	15.8324	15.0177	0.814709	M/613	15.9403	15.1515	0.788831	-0.05195	1.03667
M/607	15.7042	15.0307	0.673522	M/619	15.7687	15.0036	0.765124	-0.0756564	1.05384
F/640	15.9143	15.2049	0.709386	F/634	15.6963	15.2812	0.415195	-0.425586	1.34312
F/642	15.7218	14.9431	0.778678	F/638	15.6694	14.9891	0.680318	-0.160463	1.11765
M/643	15.8804	15.1069	0.773533	M/795	15.7374	15.0175	0.719911	-0.12087	1.08739
M/654	15.7519	14.8208	0.931118
F/646
F/722	16.2047	14.9749	1.22979
F/724	15.9683	15.1528	0.815514
Average	15.8723	15.0315	0.840781	Average	15.7624	15.0886	0.673876	-0.166905	1.12773
Median	15.8564	15.0242	0.796693	Median	15.7374	15.0175	0.719911	-0.12087	1.08739
SD	0.164117	0.123089	0.17502	SD	0.106437	0.12571	0.150514	0.150514	0.124372
	P value								0.0556208
LDHA	0.213214
PPIA	0.436748							PPIA	LDHA
Ct	0.106483						Blank	34.7875	28.9707
Relative Fold	0.000268674						Blank	30.9021	26.4825
Fold Incr	1.12265

## Sheet: Hey1
Source Data for Figure 8H
								PPIA	2022-01-26
								Hey1	2022-02-18
RNA Extractions done by JL
Original Nano and dilutions by JL
Mice were 12 wks old at termination
Control	Hey1	PPIA	∆Ct	Mutant	Hey1	PPIA	∆Ct	∆∆Ct
M/601	23.0205	15.0177	8.00281	M/613	22.7206	15.1515	7.5691	0.302194	0.811018
M/607	22.5966	15.0307	7.56597	M/619	22.5921	15.0036	7.58856	0.321653	0.800153
F/640	22.8652	15.2049	7.66036	F/634	22.1749	15.2812	6.89372	-0.373191	1.29521
F/642	20.4726	14.9431	5.52954	F/638	21.8223	14.9891	6.83324	-0.433671	1.35067
M/643				M/795	23.0106	15.0175	7.99309	0.726186	0.6045
M/654	22.832	14.8208	8.01122
F/646	21.5602	15.1744	6.3858
F/722
F/724	22.8655	15.1528	7.71264
Average	22.3161	15.0492	7.26691	Average	22.4641	15.0886	7.37554	0.108634	0.97231
Median	22.832	15.0307	7.66036	Median	22.5921	15.0175	7.5691	0.302194	0.811018
SD	0.949937	0.138677	0.942803	SD	0.468054	0.12571	0.49761	0.49761	0.331043
	P value								0.0731387
Hey1	0.756543
PPIA	0.625925							PPIA	Hey1
Ct	0.820231						Blank	34.7875	Undetermined
Relative Fold	0.367532						Blank	30.9021	Undetermined
Fold Incr	0.927466

## Sheet: Hey2
Source Data for Figure 8H
								PPIA	2022-01-26
								Hey2	2022-02-18
RNA Extractions done by JL
Original Nano and dilutions by JL
Mice were 12 wks old at termination
Control	Hey2	PPIA	∆Ct	Mutant	Hey2	PPIA	∆Ct	∆∆Ct
M/601	26.6191	15.0177	11.6014	M/613	26.6431	15.1515	11.4916	0.0662055	0.955147
M/607	26.8792	15.0307	11.8486	M/619	26.8981	15.0036	11.8945	0.469079	0.722425
F/640	26.5515	15.2049	11.3466	F/634	26.5869	15.2812	11.3057	-0.119669	1.08649
F/642	25.9063	14.9431	10.9632	F/638	26.2665	14.9891	11.2774	-0.148001	1.10803
M/643	26.5469	15.1069	11.4401	M/795	26.6923	15.0175	11.6749	0.249462	0.84121
M/654	26.542	14.8208	11.7212
F/646	25.8826	15.1744	10.7082
F/722	26.7489	14.9749	11.774
F/724
Average	26.4596	15.0342	11.4254	Average	26.6174	15.0886	11.5288	0.103415	0.94266
Median	26.5492	15.0242	11.5207	Median	26.6431	15.0175	11.4916	0.0662055	0.955147
SD	0.367849	0.126314	0.405924	SD	0.228639	0.12571	0.259519	0.259519	0.163543
	P value								0.0731387
Hey2	0.411464
PPIA	0.465244							PPIA	Hey2
Ct	0.62394						Blank	34.7875	Undetermined
Relative Fold	0.131722						Blank	30.9021	Undetermined
Fold Incr	0.930827
