# Supplementary material for: Contrasting effects of Ksr2, an obesity gene, on trabecular bone volume and bone marrow adiposity
Source: eLife. 2022 Nov 7;11:e82810. doi: 10.7554/eLife.82810 (PMC9640193; doi:10.7554/eLife.82810)
Supplement: Supplementary file 1. — Methods Table 1. [file elife-82810-supp1.xlsx]

## Sheet: Sheet1
	Supplementary File 1
	Real Time quantitative PCR Primers
	Gene		Primer Sequences
	Cfd	F	GCAGTGGGTGCTCAGT GCT
		R	TCGTCATCCGTCACTC CATC
	Alpl	F	ATGGTAACGGGCCTGGCTACA
		R	AGTTCTGCTCATGGACGCCGT
	Slc7a10	F	GGGTGGCACTCAAGAAAGAG
		R	AGTGTTCCAGGACACCCTTG
	Axin2	F	AGGGAGAAATGTGTGGATAC
		R	TCTCGTATGTAGGTCTTGGT
	Ibsp	F	AACGGGTTTCAGCAGACAACC
		R	TAAGCTCGGTAAGTGTCGCCA
	Cebpa	F	AAACAACGCAACGTGGAGAC
		R	TGTCCAGTTCACGGCTCAG
	Ctsk	F	GAACGAGAAAGCCCTGAAGAGA
		R	TATCGAGTGCTTGCTTCCCTTC
	Ccnd1	F	AATGTACTCTGCTTTGCTGAA
		R	ATGAGACCACTAGAGGTCG
	Fabp4	F	TGAAATCACCGCAGACGACA
		R	ACACATTCCACCACCAGCTT
	Slc2a1	F	GGGCATGTGCTTCCAGTATGT
		R	ACGAGGAGCACCGTGAAGAT
	Hey1	F	GCCGACGAGACCGAATCAATA
		R	GGCGTGCGCGTCAAAATAAC
	Hey2	F	AGCGAGAACAATTACCCTGG
		R	GTTGTCGGTGAATTGGACCT
	Hif1a	F	TGACGGCGACATGGTTTACA
		R	ACTAAACACACAGCGGAGCT
	Epas1	F	TCATTGCTGTGGTGACCCAA
		R	AGAGCAAAGACGTGTCCACC
	Ksr1	F	TTCCCAAGGCCCTGACAAAG
		R	AATGTCTGGGAAGCTGAACCT
	Ksr2	F	CGGGAAAGGGATGCTTTTTGG
		R	GACTCCGTTCGCACTAACCT
	Ldha1	F	ACGCAGACAAGGAGCAGTGGAA
		R	ATGCTCTCAGCCAAGTCTGCCA
	Lep	F	TGCTGCAGATAGCCAATGAC
		R	GAGTAGAGTGAGGCTTCCAGGA
	Bglap2	F	CTCTCTCTGCTCACTCTGCT
		R	TTTGTAGGCGGTCTTCAAGC
	Spp1	F	GAAAGGGCAGCCATGAGTCAAG
		R	TGTGGCTCTGATGTTCCAGGCT
	Sp7	F	TCCTCTCTGCTTGAGGAAGAAG
		R	GAGTCCATTGGTGCTTGAGAAG
	Pgk1	F	CTGTGGTACTGAGAGCAGCAAGA
		R	CAGGACCATTCCAAACAATCTG
	Pparg	F	GAGGGCGATCTTGACAGGAA
		R	GGATCGAAACTGGCACCCTT
	Ppia	F	GGGTTCCTCCTTTCACAGAA
		R	GATGCCAGGACCTGTATGCT
	Prdm16	F	CCGACACCATGCGATCCAA
		R	CCTTGGGAGTGAAGTCCTCG
	Runx2	F	AAAGCCAGAGTGGACCCTTCCA
		R	ATAGCGTGCTGCCATTCGAGGT
	Tcf7l2	F	AGGAGAGAAAGACCCCAAAG
		R	CGTCTTTGAAGGAGATCAGC
	Acp5	F	CACTCAGCTGTCCTGGCTCAA
		R	CTGCAGGTTGTGGTCATGTCC
	Ucp1	F	GAACAGCTCCGTTGACTTTA
		R	TCATACACTCCCACCTCTC
	Vegfa	F	ATGCGGATCAAACCTCACCAAA
		R	TTCTGGCTTTGTTCTGTCTTTCTTT
	Wnt5a	F	CAAATAGGCAGCCGAGAGAC
		R	CTCTAGCGTCCACGAACTCC
	Wnt5b	F	CTGCTTGCGTAATGAGACCA
		R	AAAGCAACACCAGTGGAACC
	Wnt7	F	CTCTTTCTCAGCCTGGGCATA
		R	TCTCCTATGACGATGATGGCG
	Wnt8b	F	ACCCTGCCTTTCTCCGAAGA
		R	GCGGTGAAGGACACAAGTGACT
